# Supplementary material for: N-Heterocyclic carbene rhodium(i) complexes containing an axis of chirality: dynamics and catalysis
Source: Royal Society of Chemistry journal article supplement (doi:10.1039/c3nj01620j), 2014-01-01
Supplement: c3nj01620j1.pdf [file c3nj01620j1.pdf]

***N*-Heterocyclic Carbene Rhodium(I) Complexes Containing an Axis of Chirality:  
Dynamics and Catalysis**

*M. Cristina Cassani,\* Marta Anna Brucka, Cristina Femoni, Michele Mancinelli, Andrea Mazzanti,  
Rita Mazzoni,\* Gavino Solinas*

Dipartimento di Chimica Industriale "Toso-Montanari", viale Risorgimento 4, I-40136 Bologna,  
Italy.

**Supplementary Information**

|                                                                                                                                                     |       |
|-----------------------------------------------------------------------------------------------------------------------------------------------------|-------|
| Synthesis: additional experimental and characterization data                                                                                        | 2-6   |
| Crystal data and experimental details, molecular structure of <b>2b</b> , most relevant bond lengths (Å) and angles (°) for <b>3a</b> and <b>3b</b> | 7-9   |
| Computational details                                                                                                                               | 10-39 |
| Catalysis: additional graphs and experimental data                                                                                                  | 40-53 |

---

\*To whom correspondence should be addressed. E-mail: maria.cassani@unibo.it (M.C.C.),  
rita.mazzoni@unibo.it (R.M.); fax: +39 0512093694; phone: +39 051 2093700.

### ***Synthesis: additional experimental and characterization data***

#### **Synthesis of 1-benzyl-3-methyl-imidazolium bromide (1a).<sup>1</sup>**

In a 100 mL round-bottom flask to a solution of 1-methylimidazole (0.24 mL, 3.0 mmol) in acetonitrile (15 mL), an equivalent molar amount of benzyl bromide (0.36 mL, 3.0 mmol) was added. After stirring for 12 h at room temperature, the solvent was removed under vacuum, and the resulting pale yellow, viscous oil was thoroughly washed with diethyl ether (3 x 10 mL), Etp and hexane. After separation from the washings the oil was kept under vacuum at 40 °C for several hours to yield 0.720 g (Y = 94%) of **1a**. <sup>1</sup>H NMR (399.9 MHz, CDCl<sub>3</sub>): δ 10.58 (s, 1H, NCHN), 7.49-7.37 (m, 5H, Ph), 7.30 (bs, 1H, CH<sub>im</sub>), 7.23 (bs, 1H, CH<sub>im</sub>), 5.57 (s, 2H, CH<sub>2</sub>Ph), 4.08 (s, 3H, CH<sub>3</sub>). <sup>13</sup>C NMR (100 MHz, CDCl<sub>3</sub>): δ 137.9 (NCHN), 132.7 (C<sub>q</sub>, Ph), 129.62 (Ph), 129.5 (Ph), 129.0 (Ph), 123.2 (CH<sub>im</sub>), 121.6 (CH<sub>im</sub>), 53.6 (CH<sub>2</sub>Ph), 36.9 (CH<sub>3</sub>). ESI-MS (MeOH, m/z): 173 (100) [C<sub>11</sub>H<sub>13</sub>N<sub>2</sub>]<sup>+</sup>; 79 (100), 81 (97) [Br]<sup>-</sup>.

#### **Synthesis of 1,3-dibenzyl-imidazolium bromide (1b).<sup>2</sup>**

In a 100 mL round-bottom flask to a solution of 1-benzylimidazole (0.48 g, 3.0 mmol) in acetonitrile (15 mL), an equivalent molar amount of benzyl bromide (0.36 mL, 3.0 mmol) was added. After stirring for 12 h at room temperature, the solvent was removed under vacuum, and the resulting pale yellow, viscous oil was thoroughly washed with diethyl ether (10 mL) and Etp (10 mL). After separation from the washings the oil was kept under vacuum at 40 °C for several hours to yield 0.98 g (Y = 99%) of **1b**. <sup>1</sup>H NMR (399.9 MHz, CDCl<sub>3</sub>): δ 10.59 (s, 1H, NCHN), 7.43 (m, 4H, Ph), 7.41 (d, 2H, J<sub>H,H</sub> = 1.5 Hz, CH<sub>im</sub>), 7.28 (m, 6H, Ph), 5.50 (s, 4H, CH<sub>2</sub>Ph). <sup>13</sup>C NMR (100.6 MHz, CDCl<sub>3</sub>): δ 136.3 (NCHN), 132.8 (C<sub>q</sub>, Ph), 129.2 (Ph), 129.1 (Ph), 128.8 (Ph), 122.0 (CH<sub>im</sub>), 53.0 (CH<sub>2</sub>Ph). ESI-MS (MeOH, m/z): 249 (100) [C<sub>17</sub>H<sub>17</sub>N<sub>2</sub>]<sup>+</sup>; 79 (97), 81 (100) [Br]<sup>-</sup>.

#### **Synthesis of 1-tert-butylimidazole.<sup>3</sup>**

In a 100 mL three-necked flask connected to two dropping funnels and a condenser, was placed 50 mL of distilled water. One dropping funnel contained a mixture of 40% aqueous glyoxal (11.5 mL,

0.10 mol) and 40% aqueous formaldehyde (8.1 mL, 0.10 mol), the other *tert*-butylamine (10.6 mL, 0.10 mol) and 25% aqueous ammonia (6.8 mL, 0.10 mol). The water was heated until boiling, and then both solutions were added simultaneously. The reaction mixture turned brown and was stirred for 30 min at 100 °C after complete addition and then cooled to room temperature. After removal of the water by rotatory evaporator, the crude product was purified via vacuum distillation (bp. 53°C/0.9 mbar) and 1-*tert*-butylimidazole was obtained as a very pale yellow liquid (1.49 g, 12%). <sup>1</sup>H NMR (399.9 MHz, CDCl<sub>3</sub>): δ 7.6 (s, 1H, NCHN), 7.1 (s, 1H, CH<sub>im</sub>), 7.0 (s, 1H, CH<sub>im</sub>), 1.6 (s, 9H, CH<sub>3</sub>, <sup>t</sup>Bu). <sup>13</sup>C NMR (100.6 MHz, CDCl<sub>3</sub>): δ 134.3 (NCHN), 129.1 (C<sub>im</sub>), 116.3 (C<sub>q</sub>, <sup>t</sup>Bu), 30.6 (CH<sub>3</sub>, <sup>t</sup>Bu).

#### Synthesis of 1-benzyl-3-*tert*-butylimidazolium bromide (**1d**).<sup>4</sup>

In a Schlenk to a solution of 1-*tert*-butylimidazole (0.17 g, 1.40 mmol) in acetonitrile (5 mL), an equivalent molar amount of benzyl bromide (0.15 mL, 1.40 mmol) was added. After stirring for 48 h at room temperature, the solvent was removed under vacuum, and the resulting white solid was thoroughly washed with diethyl ether (2 x 4 mL). After separation from the washings the solid was kept under vacuum for 1 hour to yield 0.33 g (83%) of **1d**. <sup>1</sup>H NMR (399.9 MHz, CDCl<sub>3</sub>): δ 10.66 (s, 1H, NCHN), 7.55 (dd, 1H, <sup>3</sup>J<sub>H,H</sub> ≈ <sup>4</sup>J<sub>H,H</sub> = 1.82 Hz, CH<sub>im</sub>), 7.51 (m, 2H, Ph), 7.45 (dd, 1H, <sup>3</sup>J<sub>H,H</sub> ≈ <sup>4</sup>J<sub>H,H</sub> = 1.80 Hz, CH<sub>im</sub>), 7.25 (m, 3H, Ph), 5.62 (s, 2H, CH<sub>2</sub>Ph), (s, 9H, CH<sub>3</sub>, <sup>t</sup>Bu). <sup>13</sup>C NMR (100.6 MHz, CDCl<sub>3</sub>): δ 137.5 (NCHN), 133.3 (C<sub>q</sub>, Ph), 129.0 (Ph), 128.1 (Ph), 122.0 (CH<sub>im</sub>), 119.8 (CH<sub>im</sub>), 60.2 (C<sub>q</sub>, <sup>t</sup>Bu), 52.7 (CH<sub>2</sub>Ph), 29.9 (CH<sub>3</sub>, <sup>t</sup>Bu). ESI-MS (MeOH, *m/z*): 215 (100) [C<sub>14</sub>H<sub>19</sub>N<sub>2</sub>]<sup>+</sup>; 79 (100), 81 (97) [Br]<sup>-</sup>.

#### Synthesis of 1-benzyl-3-methyl-imidazolin-2-ylidene silver bromide (**2a**).<sup>5</sup>

To a solution of **1a** (0.25 g, 0.97 mmol) in CH<sub>2</sub>Cl<sub>2</sub> (10 mL) stirred in a Schlenk, Ag<sub>2</sub>O (0.15 g, 0.63 mmol) was added. The reaction mixture was stirred for 2 h at room temperature; in the end of the reaction a colorless solution and a small amount of the black solid of Ag<sub>2</sub>O was found in the Schlenk, which was subsequently filtered on Celite and the solvent was removed under vacuum to

afford 0.32 g (82%) of a white solid identified as **2a**. <sup>1</sup>H NMR (399.9 MHz, CDCl<sub>3</sub>): δ 7.34-7.23 (m, 5H, Ph), 6.98 (d, 1H, *J*<sub>H,H</sub> = 1.8 Hz, CH<sub>im</sub>), 6.93 (d, 1H, *J*<sub>H,H</sub> = 1.8 Hz, CH<sub>im</sub>), 5.28 (s, 2H, CH<sub>2</sub>Ph), 3.84 (s, 3H, CH<sub>3</sub>). <sup>13</sup>C NMR (100.6 MHz, CDCl<sub>3</sub>): δ 181.9 (s, C-Ag), 135.5 (C<sub>q</sub>, Ph), 129.1 (Ph), 128.65 (Ph), 127.8 (Ph), 122.5 (CH<sub>im</sub>), 121.1 (CH<sub>im</sub>), 55.9 (CH<sub>2</sub>Ph), 38.7 (CH<sub>3</sub>). ESI-MS (MeOH, *m/z*): 173 (100) [C<sub>11</sub>H<sub>13</sub>N<sub>2</sub>]<sup>+</sup>; 451 (45) [Ag(NHC)<sub>2</sub>]<sup>+</sup>.

#### Synthesis of 1,3-dibenzyl-imidazolin-2-ylidene silver bromide (**2b**).<sup>6</sup>

To a solution of **1b**, (0.20 g, 0.61 mmol) in CH<sub>2</sub>Cl<sub>2</sub> (ca. 10 mL) stirred in a Schlenk, Ag<sub>2</sub>O (0.09 g, 0.39 mmol) was added. The reaction mixture was stirred for 2 h at room temperature and then filtered on a Celite pad. The solvent was removed under vacuum to afford 0.28 g (95%) of a white solid identified as **2b**. <sup>1</sup>H NMR (399.9 MHz, CDCl<sub>3</sub>): δ 7.29-7.18 (m, 10 H, Ph), 6.99 (s, 2H, CH<sub>im</sub>), 5.21 (s, 4H, CH<sub>2</sub>Ph). <sup>13</sup>C NMR (100.6 MHz, CDCl<sub>3</sub>): δ 180.6 (s, C-Ag), 135.5 (C<sub>q</sub>, Ph), 128.8 (Ph), 128.3 (Ph), 127.6 (Ph), 121.62 (C<sub>im</sub>), 55.33 (CH<sub>2</sub>Ph).

#### Synthesis of 1-benzyl-3-tert-butyl-imidazolin-2-ylidene silver bromide (**2d**).<sup>7</sup>

To a solution of **1d**, (0.066 g, 0.22 mmol) in CH<sub>2</sub>Cl<sub>2</sub> (5 mL) stirred in a Schlenk, (0.026 g, 0.11 mmol) of Ag<sub>2</sub>O was added. The suspension was stirred for 48 h and then filtrated on a Celite pad. The solvent was removed under vacuum and the white solid analyzed by NMR analysis. <sup>1</sup>H NMR (300.1 MHz, CDCl<sub>3</sub>): δ 7.32-7.21 (m, 5H, Ph), 7.16 (d, 1H, *J*<sub>H,H</sub> = 1.9 Hz, CH<sub>im</sub>), 6.90 (d, 1H, *J*<sub>H,H</sub> = 1.9 Hz, CH<sub>im</sub>), 5.32 (s, 2H, CH<sub>2</sub>Ph), 1.72 (s, 9H, <sup>t</sup>Bu). <sup>13</sup>C NMR (75.5 MHz, CDCl<sub>3</sub>): δ 178.2 (s, C-Ag), 135.4 (C<sub>q</sub>, Ph), 129.0 (Ph), 128.6 (Ph), 127.8 (Ph), 119.4 (CH<sub>im</sub>), 57.9 (C<sub>q</sub>, <sup>t</sup>Bu), 56.9 (CH<sub>2</sub>Ph), 31.78 (<sup>t</sup>Bu). ESI-MS (MeOH, *m/z*): 537 (100) [Ag(NHC)<sub>2</sub>]<sup>+</sup>, 321 (50) [Ag(NHC)]<sup>+</sup>. In the ESI-MS(-) spectrum, no peaks were observed.

**Table 1S.** The most significant chemical shifts in  $^1\text{H}$  NMR spectra of the rhodium(I)-NHC complexes **3a-d** acquired at 298 K.

| Compounds                   | $\text{CH}_{\text{im}}$<br>$\delta$ (ppm)                                  | $\text{CH}_2\text{Ph}$<br>$\delta$ (ppm)                                     | $\text{CH}_{\text{NBD}}$<br>$\delta$ (ppm)                           | $\text{CH}_2(\text{NBD})$<br>$\delta$ (ppm)                                |
|-----------------------------|----------------------------------------------------------------------------|------------------------------------------------------------------------------|----------------------------------------------------------------------|----------------------------------------------------------------------------|
| <b>3a</b> (Me)              | 6.76 (s)<br>6.65 (s)                                                       | 5.72 (s)                                                                     | 4.84 (s)<br>3.72 (s)<br>3.36 (br s)                                  | 1.30 (m)                                                                   |
| <b>3b</b> (Bz)              | 6.61 (s)                                                                   | 5.73 (br s)                                                                  | 4.78 (s)<br>3.60 (s)<br>3.20 (s)<br>4.61 (s)<br>3.59 (s)             | 1.20 (br d, $J_{\text{H,H}} = 1.4$ Hz)                                     |
| <b>3c</b> (Tr)              | 6.76 (d, $J_{\text{H,H}} = 2.0$ Hz)<br>6.56 (d, $J_{\text{H,H}} = 2.0$ Hz) | 6.84 (d, $J_{\text{H,H}} = 15.0$ Hz)<br>6.17 (d, $J_{\text{H,H}} = 15.0$ Hz) | 3.44 (s)<br>3.10 (s)<br>2.87 (s)<br>1.94 (s)<br>4.84 (m)<br>4.70 (m) | 0.87 (m)                                                                   |
| <b>3d</b> ( $^t\text{Bu}$ ) | 7.06 (d, $J_{\text{H,H}} = 2.0$ Hz)<br>6.72 (d, $J_{\text{H,H}} = 2.0$ Hz) | 6.41 (d, $J_{\text{H,H}} = 15.0$ Hz)<br>6.27 (d, $J_{\text{H,H}} = 15.0$ Hz) | 3.81 (br s)<br>3.78 (br s)<br>3.47 (m)                               | 1.36 (d, $J_{\text{H,H}} = 8.0$ Hz)<br>1.31 (d, $J_{\text{H,H}} = 8.0$ Hz) |

**Table 2S.** Most significant chemical shifts in  $^{13}\text{C}$  NMR spectra of the rhodium(I)-NHC complexes **3a-d** acquired at 298 K.

| Compounds | NCHN<br>$\delta$ (ppm)                 | $\text{CH}_{\text{NBD}}$<br>$\delta$ (ppm)                                                                                                                     | $\text{C}^{\prime}\text{H}_2(\text{NBD})$<br>$\delta$ (ppm) |
|-----------|----------------------------------------|----------------------------------------------------------------------------------------------------------------------------------------------------------------|-------------------------------------------------------------|
| <b>3a</b> | 184.8 (d, $J_{\text{C,Rh}} = 57.8$ Hz) | 79.0 (d, $J_{\text{C,Rh}} = 6.0$ Hz)<br>51.0 (d, $J_{\text{C,Rh}} = 2.5$ Hz)<br>48.3 (d, $J_{\text{C,Rh}} = 12.8$ Hz)                                          | 63.4 (d, $J_{\text{C,Rh}} = 5.2$ Hz)                        |
| <b>3b</b> | 185.4 (d, $J_{\text{C,Rh}} = 58.3$ Hz) | 79.1 (d, $J_{\text{C,Rh}} = 5.7$ Hz)<br>51.0 (d, $J_{\text{C,Rh}} = 2.0$ Hz)<br>48.5 (d, $J_{\text{C,Rh}} = 17.0$ Hz)                                          | 63.3 (d, $J_{\text{C,Rh}} = 5.3$ Hz)                        |
| <b>3c</b> | 186.6 (d, $J_{\text{C,Rh}} = 55.1$ Hz) | 73.1 (s), 49.7 (s), 49.0 (s)<br>45.7 (d, $J_{\text{C,Rh}} = 13.0$ Hz)<br>44.7 (d, $J_{\text{C,Rh}} = 10.8$ Hz)                                                 | 61.8 (d, $J_{\text{C,Rh}} = 5.8$ Hz)                        |
| <b>3d</b> | 183.0 (d, $J_{\text{C,Rh}} = 58.5$ Hz) | 74.9 (d, $J_{\text{C,Rh}} = 6.1$ Hz)<br>71.8 (d, $J_{\text{C,Rh}} = 6.3$ Hz)<br>48.2 (d, $J_{\text{C,Rh}} = 12.7$ Hz)<br>46.3 (d, $J_{\text{C,Rh}} = 12.1$ Hz) | 62.7 (d, $J_{\text{C,Rh}} = 5.2$ Hz)                        |

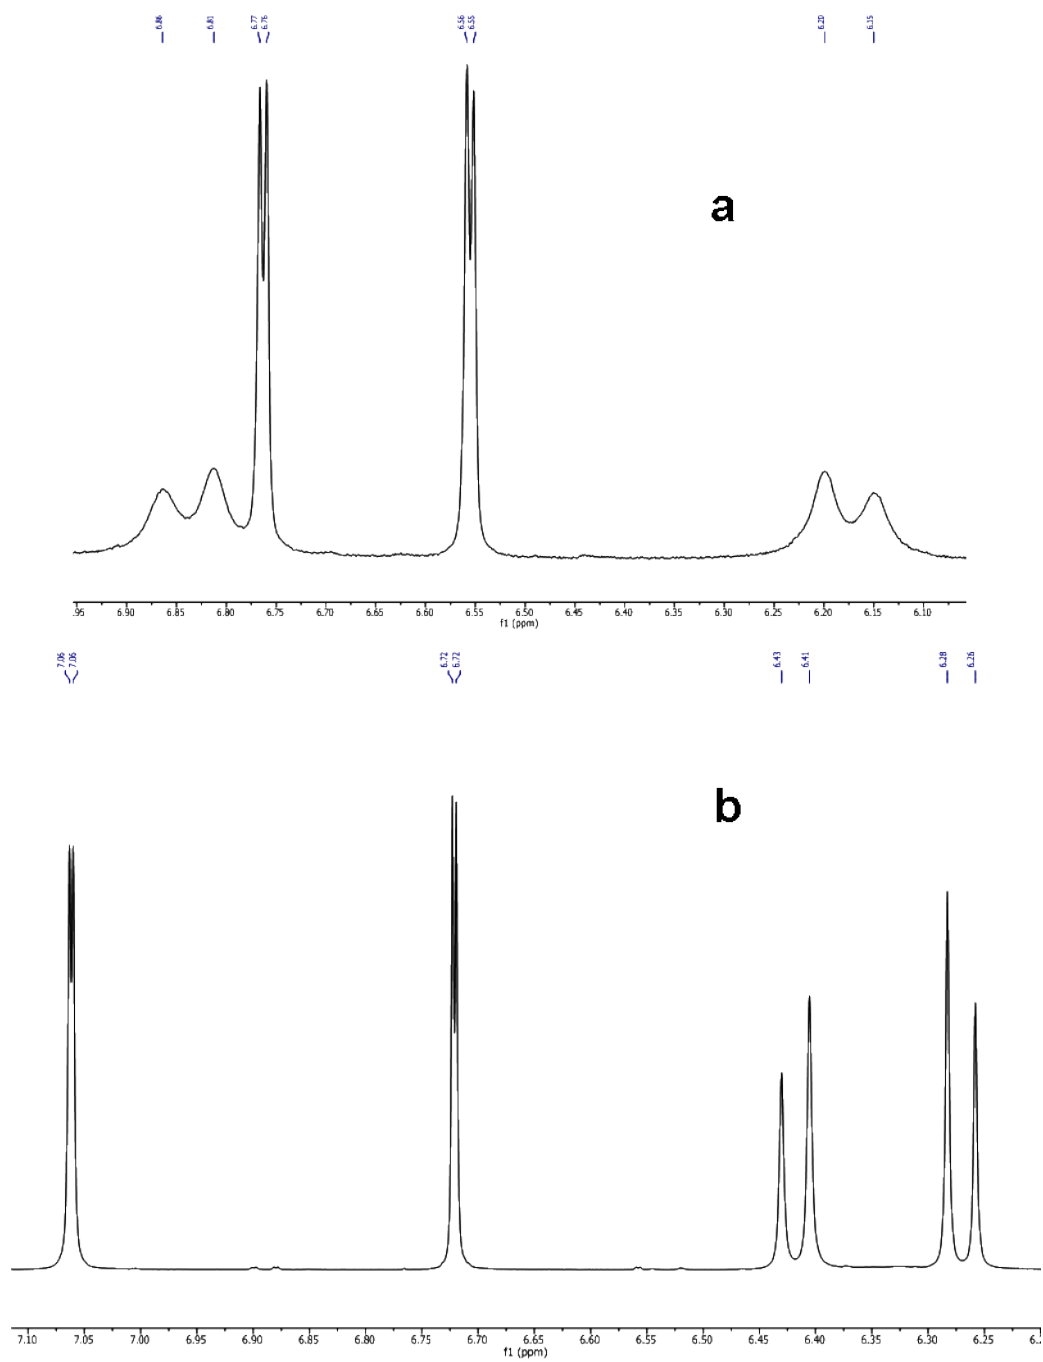

**Fig. 1S (a)**  $^1\text{H}$  NMR (300.1 MHz,  $\text{CDCl}_3$ , 298 K) spectrum of **3c**; **(b)**  $^1\text{H}$  NMR (599.7 MHz,  $\text{CDCl}_3$ , 298 K) spectrum of **3d**.

**Table 3S** Crystal data, data collection and refinement parameters for **2b**, **3a** and **3b**.

|                                                  | <b>2b</b>                                                           | <b>3a</b>                                                           | <b>3b</b>                                                           |
|--------------------------------------------------|---------------------------------------------------------------------|---------------------------------------------------------------------|---------------------------------------------------------------------|
| formula                                          | C <sub>34</sub> H <sub>32</sub> AgBrN <sub>4</sub>                  | C <sub>18</sub> H <sub>20</sub> ClN <sub>2</sub> Rh                 | C <sub>24</sub> H <sub>24</sub> ClN <sub>2</sub> Rh                 |
| <i>fw</i>                                        | 684.42                                                              | 402.72                                                              | 478.81                                                              |
| <i>T</i> , K                                     | 296(2)                                                              | 296(2)                                                              | 296(2)                                                              |
| $\lambda$ , Å                                    | 0.71073                                                             | 0.71073                                                             | 0.71073                                                             |
| crystal system                                   | monoclinic                                                          | monoclinic                                                          | monoclinic                                                          |
| space group                                      | <i>P</i> 2 <sub>1</sub> / <i>n</i>                                  | <i>P</i> 2 <sub>1</sub> / <i>c</i>                                  | <i>P</i> 2 <sub>1</sub> / <i>n</i>                                  |
| <i>a</i> , Å                                     | 13.3816(14)                                                         | 10.5190 (6)                                                         | 11.3295(6)                                                          |
| <i>b</i> , Å                                     | 9.8169(11)                                                          | 10.7555(6)                                                          | 10.5864(6)                                                          |
| <i>c</i> , Å                                     | 23.974(3)                                                           | 14.8470(9)                                                          | 18.0379(9)                                                          |
| $\alpha$ , deg                                   | 90                                                                  | 90                                                                  | 90                                                                  |
| $\beta$ , deg                                    | 104.4500(10)                                                        | 90.5320(10)                                                         | 106.8260(10)                                                        |
| $\gamma$ , deg                                   | 90                                                                  | 90                                                                  | 90                                                                  |
| cell volume, Å <sup>3</sup>                      | 3049.8(6)                                                           | 1679.67(17)                                                         | 2070.82(19)                                                         |
| <i>Z</i>                                         | 4                                                                   | 4                                                                   | 4                                                                   |
| <i>D<sub>c</sub></i> , g cm <sup>-3</sup>        | 1.491                                                               | 1.593                                                               | 0.965                                                               |
| $\mu$ , mm <sup>-1</sup>                         | 2.000                                                               | 1.173                                                               | 0.965                                                               |
| F(000)                                           | 1384                                                                | 816                                                                 | 1.536                                                               |
| crystal size, mm                                 | 0.20 x 0.15 x 0.12                                                  | 0.20 x 0.15 x 0.10                                                  | 0.25 x 0.25 x 0.10                                                  |
| $\theta$ limits, °                               | 1.60 to 24.99                                                       | 1.94 to 24.99                                                       | 1.91 to 25.00                                                       |
| index ranges                                     | -15 ≤ <i>h</i> ≤ 15,<br>-11 ≤ <i>k</i> ≤ 11,<br>-28 ≤ <i>l</i> ≤ 28 | -12 ≤ <i>h</i> ≤ 12,<br>-12 ≤ <i>k</i> ≤ 12,<br>-17 ≤ <i>l</i> ≤ 17 | -13 ≤ <i>h</i> ≤ 13,<br>-12 ≤ <i>k</i> ≤ 12,<br>-21 ≤ <i>l</i> ≤ 21 |
| Reflexions collected                             | 28358                                                               | 15678                                                               | 19412                                                               |
| Independent reflections                          | 5368<br>[R(int) = 0.0301]                                           | 2959<br>[R(int) = 0.0362]                                           | 3655<br>[R(int) = 0.0234]                                           |
| completeness to<br>$\theta = 25.00^\circ$        | 100.0%                                                              | 100.0%                                                              | 100.0%                                                              |
| data/restraints/parameters                       | 5368 / 0 / 361                                                      | 2959 / 0 / 200                                                      | 3655 / 0 / 253                                                      |
| goodness on fit on <i>F</i> <sup>2</sup>         | 1.051                                                               | 1.051                                                               | 1.044                                                               |
| R <sub>1</sub> ( <i>I</i> > 2σ( <i>I</i> ))      | 0.0756                                                              | 0.0319                                                              | 0.0218                                                              |
| wR <sub>2</sub> (all data)                       | 0.2494                                                              | 0.0445                                                              | 0.0261                                                              |
| largest diff peak and<br>hole, e Å <sup>-3</sup> | 2.881 and -2.671                                                    | 0.800 and -0.313                                                    | 0.331 and -0.285                                                    |

*Molecular structure of 2b*

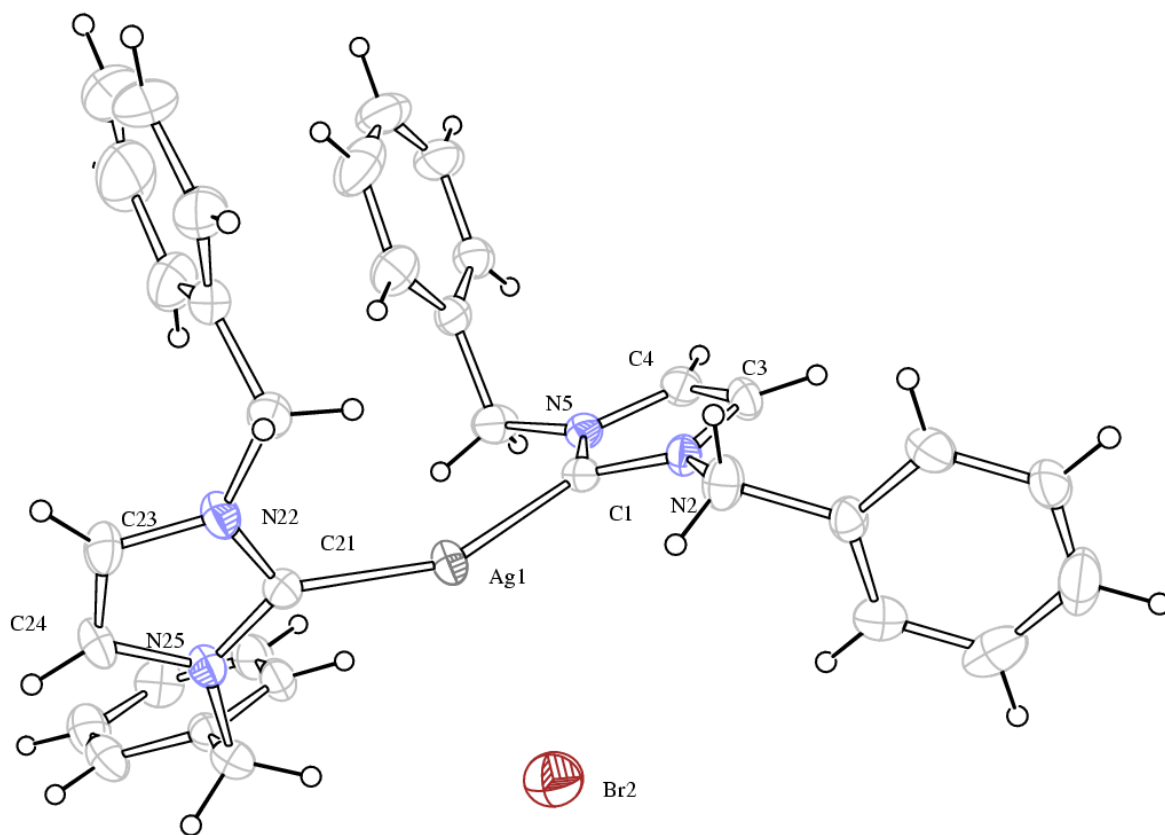

**Fig. 2S.** Crystal structure of  $C_{34}H_{32}AgBrN_4$  (compound **2b**) depicted with thermal ellipsoids at 30% probability.



**Table 4S.** Most relevant bond lengths (Å) and angles (°) for **3a** and **3b**.

| Description       |                   | 3a         | 3b         |
|-------------------|-------------------|------------|------------|
| Rh(1)-C(1)        |                   | 2.019(4)   | 2.023(2)   |
| Rh(1)-C(16)       | Rh(1)-C(20)       | 2.083(4)   | 2.084(2)   |
| Rh(1)-C(20)       | Rh(1)-C(21)       | 2.098(4)   | 2.091(2)   |
| Rh(1)-C(14)       | Rh(1)-C(22)       | 2.194(4)   | 2.185(2)   |
| Rh(1)-C(15)       | Rh(1)-C(23)       | 2.213(4)   | 2.195(2)   |
| Rh(1)-Cl(2)       |                   | 2.3800(11) | 2.3618(6)  |
| C(1)-Rh(1)-C(16)  | C(1)-Rh(1)-C(20)  | 97.00(15)  | 99.49(9)   |
| C(1)-Rh(1)-C(20)  | C(1)-Rh(1)-C(21)  | 99.27(15)  | 98.63(9)   |
| C(16)-Rh(1)-C(20) | C(20)-Rh(1)-C(21) | 39.25(16)  | 38.79(10)  |
| C(1)-Rh(1)-C(14)  | C(1)-Rh(1)-C(22)  | 156.71(16) | 161.04(10) |
| C(16)-Rh(1)-C(14) | C(20)-Rh(1)-C(22) | 66.99(17)  | 66.97(10)  |
| C(20)-Rh(1)-C(14) | C(21)-Rh(1)-C(22) | 79.23(17)  | 79.25(10)  |
| C(1)-Rh(1)-C(15)  | C(1)-Rh(1)-C(23)  | 161.52(16) | 158.45(9)  |
| C(16)-Rh(1)-C(15) | C(20)-Rh(1)-C(23) | 79.41(17)  | 79.23(10)  |
| C(20)-Rh(1)-C(15) | C(21)-Rh(1)-C(23) | 66.44(17)  | 66.76(10)  |
| C(14)-Rh(1)-C(15) | C(22)-Rh(1)-C(23) | 36.44(15)  | 36.18(10)  |
| C(1)-Rh(1)-Cl(2)  | C(1)-Rh(1)-Cl(2)  | 90.57(10)  | 90.83(6)   |
| C(16)-Rh(1)-Cl(2) | C(20)-Rh(1)-Cl(2) | 156.05(13) | 158.26(8)  |
| C(20)-Rh(1)-Cl(2) | C(21)-Rh(1)-Cl(2) | 160.57(13) | 157.87(8)  |
| C(14)-Rh(1)-Cl(2) | C(22)-Rh(1)-Cl(2) | 98.19(13)  | 97.99(8)   |
| C(15)-Rh(1)-Cl(2) | C(23)-Rh(1)-Cl(2) | 100.01(14) | 97.99(7)   |

### ***Computational details***

Compound **3a** Ground State

Method: b3lyp/LanL2DZ

SCF Done: E(RB3LYP) = -931.806133765 A.U. after 1 cycles

Lowest frequency = 25.4913

Zero-point correction= 0.344421

(Hartree/Particle)

Thermal correction to Energy= 0.364776

Thermal correction to Enthalpy= 0.365720

Thermal correction to Gibbs Free Energy= 0.292827

Sum of electronic and zero-point Energies= -931.461713

Sum of electronic and thermal Energies= -931.441358

Sum of electronic and thermal Enthalpies= -931.440414

Sum of electronic and thermal Free Energies= -931.513307

Standard orientation:

---

| Center | Atomic | Atomic | Coordinates (Angstroms) |           |           |
|--------|--------|--------|-------------------------|-----------|-----------|
| Number | Number | Type   | X                       | Y         | Z         |
| 1      | 45     | 0      | -1.273080               | 0.000580  | 0.309303  |
| 2      | 17     | 0      | -0.276918               | 0.235470  | 2.541669  |
| 3      | 7      | 0      | 1.300594                | 0.987847  | -1.056368 |
| 4      | 7      | 0      | 0.141206                | 2.651357  | -0.256780 |
| 5      | 6      | 0      | -3.325057               | -0.838947 | 0.917964  |
| 6      | 1      | 0      | -3.575123               | -0.457703 | 1.899992  |
| 7      | 6      | 0      | -2.499972               | -1.920484 | 0.617867  |

---

|    |   |   |           |           |           |
|----|---|---|-----------|-----------|-----------|
| 8  | 1 | 0 | -1.974423 | -2.558464 | 1.317181  |
| 9  | 6 | 0 | -2.784706 | 0.187624  | -1.206393 |
| 10 | 1 | 0 | -2.831138 | 1.127208  | -1.745686 |
| 11 | 6 | 0 | -1.936786 | -0.925997 | -1.516434 |
| 12 | 1 | 0 | -1.234160 | -0.982239 | -2.340563 |
| 13 | 6 | 0 | -3.993985 | -0.404790 | -0.418612 |
| 14 | 1 | 0 | -4.876213 | 0.230314  | -0.334122 |
| 15 | 6 | 0 | -2.642204 | -2.178776 | -0.910439 |
| 16 | 1 | 0 | -2.301247 | -3.149901 | -1.270463 |
| 17 | 6 | 0 | -4.146905 | -1.796534 | -1.123246 |
| 18 | 1 | 0 | -4.838999 | -2.468326 | -0.600004 |
| 19 | 1 | 0 | -4.421598 | -1.712575 | -2.182147 |
| 20 | 6 | 0 | 0.123377  | 1.278792  | -0.394965 |
| 21 | 6 | 0 | 1.303639  | 3.201291  | -0.823873 |
| 22 | 1 | 0 | 1.511776  | 4.258724  | -0.813497 |
| 23 | 6 | 0 | 2.034618  | 2.155204  | -1.322097 |
| 24 | 1 | 0 | 2.999791  | 2.137908  | -1.800626 |
| 25 | 6 | 0 | 1.771356  | -0.382958 | -1.350865 |
| 26 | 1 | 0 | 1.917832  | -0.482488 | -2.434228 |
| 27 | 1 | 0 | 0.952079  | -1.044653 | -1.049533 |
| 28 | 6 | 0 | 3.054905  | -0.744391 | -0.614896 |
| 29 | 6 | 0 | 4.197156  | -1.147492 | -1.335955 |
| 30 | 6 | 0 | 3.102699  | -0.704376 | 0.797497  |
| 31 | 6 | 0 | 5.379879  | -1.508088 | -0.660196 |
| 32 | 1 | 0 | 4.165165  | -1.184556 | -2.424284 |
| 33 | 6 | 0 | 4.284158  | -1.061231 | 1.469846  |
| 34 | 1 | 0 | 2.223991  | -0.401812 | 1.365229  |
| 35 | 6 | 0 | 5.425447  | -1.463658 | 0.745368  |

|    |   |   |           |           |           |
|----|---|---|-----------|-----------|-----------|
| 36 | 1 | 0 | 6.255442  | -1.819341 | -1.225420 |
| 37 | 1 | 0 | 4.312122  | -1.029999 | 2.556304  |
| 38 | 1 | 0 | 6.336553  | -1.740460 | 1.270940  |
| 39 | 6 | 0 | -0.893477 | 3.415040  | 0.454851  |
| 40 | 1 | 0 | -1.729414 | 3.659314  | -0.210906 |
| 41 | 1 | 0 | -1.256464 | 2.813382  | 1.291215  |
| 42 | 1 | 0 | -0.457232 | 4.340778  | 0.843122  |

-----

Compound **3a** Transition State 1

Method: b3lyp/LanL2DZ

SCF Done: E(RB3LYP) = -931.785192408 A.U. after 1 cycles

Lowest frequency = -23.7718

Zero-point correction= 0.345171 (Hartree/Particle)

Thermal correction to Energy= 0.364326

Thermal correction to Enthalpy= 0.365270

Thermal correction to Gibbs Free Energy= 0.296228

Sum of electronic and zero-point Energies= -931.440021

Sum of electronic and thermal Energies= -931.420867

Sum of electronic and thermal Enthalpies= -931.419923

Sum of electronic and thermal Free Energies= -931.488965

Standard orientation:

-----

| Center | Atomic | Atomic | Coordinates (Angstroms) |   |   |
|--------|--------|--------|-------------------------|---|---|
| Number | Number | Type   | X                       | Y | Z |

-----

|    |    |   |           |           |           |
|----|----|---|-----------|-----------|-----------|
| 1  | 45 | 0 | -1.495933 | 0.036002  | -0.009747 |
| 2  | 17 | 0 | -3.372972 | 1.508994  | 0.672209  |
| 3  | 7  | 0 | 1.314287  | 1.337181  | -0.836315 |
| 4  | 7  | 0 | -0.036314 | 2.858561  | -0.063794 |
| 5  | 6  | 0 | -3.082523 | -1.560975 | -0.308765 |
| 6  | 1  | 0 | -3.998222 | -1.068939 | -0.606640 |
| 7  | 6  | 0 | -2.576754 | -1.685591 | 0.989611  |
| 8  | 1  | 0 | -3.027481 | -1.317576 | 1.901739  |
| 9  | 6  | 0 | -0.859277 | -1.658995 | -1.199163 |
| 10 | 1  | 0 | -0.320248 | -1.450737 | -2.115826 |
| 11 | 6  | 0 | -0.334666 | -1.789642 | 0.131281  |
| 12 | 1  | 0 | 0.698050  | -1.715101 | 0.447828  |
| 13 | 6  | 0 | -2.194848 | -2.455277 | -1.213744 |
| 14 | 1  | 0 | -2.597881 | -2.704694 | -2.195401 |
| 15 | 6  | 0 | -1.369798 | -2.658998 | 0.904123  |
| 16 | 1  | 0 | -1.028816 | -3.094189 | 1.843694  |
| 17 | 6  | 0 | -1.854340 | -3.624526 | -0.229475 |
| 18 | 1  | 0 | -2.735586 | -4.213227 | 0.055474  |
| 19 | 1  | 0 | -1.058685 | -4.282826 | -0.601121 |
| 20 | 6  | 0 | 0.014556  | 1.488363  | -0.328791 |
| 21 | 6  | 0 | 1.160439  | 3.504091  | -0.399071 |
| 22 | 1  | 0 | 1.300094  | 4.564096  | -0.266070 |
| 23 | 6  | 0 | 2.009234  | 2.551164  | -0.881232 |
| 24 | 1  | 0 | 3.026788  | 2.621910  | -1.228492 |
| 25 | 6  | 0 | 1.990453  | 0.103460  | -1.272861 |
| 26 | 1  | 0 | 2.347079  | 0.248653  | -2.300879 |
| 27 | 1  | 0 | 1.252607  | -0.689035 | -1.298100 |
| 28 | 6  | 0 | 3.161113  | -0.294627 | -0.378147 |

|    |   |   |           |           |           |
|----|---|---|-----------|-----------|-----------|
| 29 | 6 | 0 | 4.338767  | -0.811998 | -0.955543 |
| 30 | 6 | 0 | 3.069734  | -0.199500 | 1.027674  |
| 31 | 6 | 0 | 5.408339  | -1.236378 | -0.143868 |
| 32 | 1 | 0 | 4.422671  | -0.885163 | -2.038897 |
| 33 | 6 | 0 | 4.138772  | -0.618206 | 1.839234  |
| 34 | 1 | 0 | 2.170506  | 0.208934  | 1.483485  |
| 35 | 6 | 0 | 5.311011  | -1.140268 | 1.256927  |
| 36 | 1 | 0 | 6.311247  | -1.633740 | -0.601420 |
| 37 | 1 | 0 | 4.058360  | -0.538512 | 2.920716  |
| 38 | 1 | 0 | 6.136881  | -1.463793 | 1.885796  |
| 39 | 6 | 0 | -1.154506 | 3.635060  | 0.507446  |
| 40 | 1 | 0 | -2.002057 | 3.655457  | -0.178289 |
| 41 | 1 | 0 | -1.503529 | 3.180657  | 1.433869  |
| 42 | 1 | 0 | -0.794304 | 4.651701  | 0.696566  |

-----

Compound **3a** Transition State 2

Method: b3lyp/LanL2DZ

SCF Done: E(RB3LYP) = -931.784384124 A.U. after 1 cycles

Lowest frequency = -23.2189

Zero-point correction= 0.344868 (Hartree/Particle)

Thermal correction to Energy= 0.364072

Thermal correction to Enthalpy= 0.365016

Thermal correction to Gibbs Free Energy= 0.295804

Sum of electronic and zero-point Energies= -931.439517

Sum of electronic and thermal Energies= -931.420312

Sum of electronic and thermal Enthalpies= -931.419368

Sum of electronic and thermal Free Energies= -931.488580

Standard orientation:

---

| Center<br>Number | Atomic<br>Number | Atomic<br>Type | Coordinates (Angstroms) |           |           |
|------------------|------------------|----------------|-------------------------|-----------|-----------|
|                  |                  |                | X                       | Y         | Z         |
| 1                | 45               | 0              | -1.269262               | -0.256598 | -0.198275 |
| 2                | 17               | 0              | 0.054421                | -2.225261 | -0.980729 |
| 3                | 7                | 0              | 1.534437                | 1.237965  | -0.661000 |
| 4                | 7                | 0              | 0.079022                | 2.622280  | 0.175446  |
| 5                | 6                | 0              | -2.778134               | -1.802202 | 0.492073  |
| 6                | 1                | 0              | -2.244292               | -2.702344 | 0.763785  |
| 7                | 6                | 0              | -3.131322               | -1.389296 | -0.797825 |
| 8                | 1                | 0              | -2.931241               | -1.909751 | -1.725015 |
| 9                | 6                | 0              | -2.726405               | 0.479028  | 1.222441  |
| 10               | 1                | 0              | -2.356681               | 1.078181  | 2.045454  |
| 11               | 6                | 0              | -3.092516               | 0.906891  | -0.098172 |
| 12               | 1                | 0              | -3.069481               | 1.911584  | -0.497131 |
| 13               | 6                | 0              | -3.502989               | -0.844517 | 1.474351  |
| 14               | 1                | 0              | -3.573345               | -1.173767 | 2.511109  |
| 15               | 6                | 0              | -4.081186               | -0.172057 | -0.628372 |
| 16               | 1                | 0              | -4.676674               | 0.103730  | -1.498849 |
| 17               | 6                | 0              | -4.829037               | -0.566062 | 0.689733  |
| 18               | 1                | 0              | -5.454406               | -1.460657 | 0.576925  |
| 19               | 1                | 0              | -5.415053               | 0.259284  | 1.113982  |
| 20               | 6                | 0              | 0.206732                | 1.284131  | -0.228510 |
| 21               | 6                | 0              | 1.268673                | 3.342206  | -0.002094 |

|    |   |   |           |           |           |
|----|---|---|-----------|-----------|-----------|
| 22 | 1 | 0 | 1.358821  | 4.384970  | 0.254928  |
| 23 | 6 | 0 | 2.179275  | 2.471193  | -0.521994 |
| 24 | 1 | 0 | 3.215137  | 2.609603  | -0.782723 |
| 25 | 6 | 0 | 2.296274  | 0.099677  | -1.248048 |
| 26 | 1 | 0 | 2.694095  | 0.447304  | -2.209681 |
| 27 | 1 | 0 | 1.593513  | -0.712746 | -1.432441 |
| 28 | 6 | 0 | 3.431508  | -0.364641 | -0.347896 |
| 29 | 6 | 0 | 4.773530  | -0.077353 | -0.674727 |
| 30 | 6 | 0 | 3.154103  | -1.107571 | 0.821519  |
| 31 | 6 | 0 | 5.825444  | -0.509969 | 0.156678  |
| 32 | 1 | 0 | 4.999957  | 0.473161  | -1.587455 |
| 33 | 6 | 0 | 4.201591  | -1.535060 | 1.655461  |
| 34 | 1 | 0 | 2.124333  | -1.365045 | 1.055052  |
| 35 | 6 | 0 | 5.540193  | -1.236012 | 1.327843  |
| 36 | 1 | 0 | 6.856226  | -0.286539 | -0.109291 |
| 37 | 1 | 0 | 3.978107  | -2.111596 | 2.550180  |
| 38 | 1 | 0 | 6.349070  | -1.573512 | 1.972024  |
| 39 | 6 | 0 | -1.119132 | 3.325937  | 0.651223  |
| 40 | 1 | 0 | -1.720343 | 3.684299  | -0.191860 |
| 41 | 1 | 0 | -1.725951 | 2.682906  | 1.277220  |
| 42 | 1 | 0 | -0.804009 | 4.189640  | 1.245323  |

-----

Compound **3b** Ground State

Method: b3lyp/LanL2DZ

SCF Done: E(RB3LYP) = -1162.82415997 A.U. after 1 cycles

Lowest frequency = 21.4369



Zero-point correction= 0.426602 (Hartree/Particle)  
 Thermal correction to Energy= 0.451159  
 Thermal correction to Enthalpy= 0.452103  
 Thermal correction to Gibbs Free Energy= 0.368312  
 Sum of electronic and zero-point Energies= -1162.397558  
 Sum of electronic and thermal Energies= -1162.373001  
 Sum of electronic and thermal Enthalpies= -1162.372057  
 Sum of electronic and thermal Free Energies= -1162.455848

Standard orientation:

| -----  |        |        |                         |           |           |  |
|--------|--------|--------|-------------------------|-----------|-----------|--|
| Center | Atomic | Atomic | Coordinates (Angstroms) |           |           |  |
| Number | Number | Type   | X                       | Y         | Z         |  |
| -----  |        |        |                         |           |           |  |
| 1      | 45     | 0      | 0.004494                | 1.537974  | 0.266728  |  |
| 2      | 17     | 0      | -0.000013               | 0.107623  | 2.268681  |  |
| 3      | 7      | 0      | -1.091969               | -0.825680 | -1.355619 |  |
| 4      | 7      | 0      | 1.087375                | -0.831707 | -1.355830 |  |
| 5      | 6      | 0      | 0.706396                | 3.510886  | 1.222812  |  |
| 6      | 1      | 0      | 1.361428                | 3.278242  | 2.052960  |  |
| 7      | 6      | 0      | -0.686225               | 3.514821  | 1.222794  |  |
| 8      | 1      | 0      | -1.342579               | 3.285790  | 2.052902  |  |
| 9      | 6      | 0      | 0.725541                | 2.992250  | -1.142095 |  |
| 10     | 1      | 0      | 1.365027                | 2.633827  | -1.941279 |  |
| 11     | 6      | 0      | -0.708225               | 2.996284  | -1.142115 |  |
| 12     | 1      | 0      | -1.349708               | 2.641528  | -1.941335 |  |
| 13     | 6      | 0      | 1.153709                | 4.110367  | -0.141996 |  |
| 14     | 1      | 0      | 2.188224                | 4.448644  | -0.206034 |  |

|    |   |   |           |           |           |
|----|---|---|-----------|-----------|-----------|
| 15 | 6 | 0 | -1.130117 | 4.116803  | -0.142023 |
| 16 | 1 | 0 | -2.162710 | 4.460894  | -0.206093 |
| 17 | 6 | 0 | 0.014748  | 5.161568  | -0.376438 |
| 18 | 1 | 0 | 0.017019  | 5.969560  | 0.365880  |
| 19 | 1 | 0 | 0.015928  | 5.574485  | -1.392844 |
| 20 | 6 | 0 | -0.000297 | -0.116547 | -0.896755 |
| 21 | 6 | 0 | 0.678962  | -1.965009 | -2.079414 |
| 22 | 1 | 0 | 1.379539  | -2.671895 | -2.492184 |
| 23 | 6 | 0 | -0.689975 | -1.961228 | -2.079277 |
| 24 | 1 | 0 | -1.394538 | -2.664194 | -2.491955 |
| 25 | 6 | 0 | -2.499637 | -0.459400 | -1.079626 |
| 26 | 1 | 0 | -2.988948 | -0.202265 | -2.028307 |
| 27 | 1 | 0 | -2.451470 | 0.443618  | -0.461029 |
| 28 | 6 | 0 | -3.277575 | -1.561779 | -0.375261 |
| 29 | 6 | 0 | -4.410960 | -2.135126 | -0.987132 |
| 30 | 6 | 0 | -2.882309 | -2.003265 | 0.907959  |
| 31 | 6 | 0 | -5.145996 | -3.142147 | -0.330535 |
| 32 | 1 | 0 | -4.723842 | -1.794430 | -1.973477 |
| 33 | 6 | 0 | -3.614574 | -3.009726 | 1.560477  |
| 34 | 1 | 0 | -2.015241 | -1.555360 | 1.390842  |
| 35 | 6 | 0 | -4.746761 | -3.582781 | 0.944791  |
| 36 | 1 | 0 | -6.020142 | -3.577188 | -0.809617 |
| 37 | 1 | 0 | -3.306573 | -3.341721 | 2.549004  |
| 38 | 1 | 0 | -5.311266 | -4.360080 | 1.454852  |
| 39 | 6 | 0 | 2.497088  | -0.473408 | -1.079758 |
| 40 | 1 | 0 | 2.987915  | -0.219120 | -2.028424 |
| 41 | 1 | 0 | 2.454010  | 0.429914  | -0.461227 |
| 42 | 6 | 0 | 3.268638  | -1.580147 | -0.375245 |

|    |   |   |          |           |           |
|----|---|---|----------|-----------|-----------|
| 43 | 6 | 0 | 4.398421 | -2.160475 | -0.987211 |
| 44 | 6 | 0 | 2.871011 | -2.018911 | 0.908179  |
| 45 | 6 | 0 | 5.127520 | -3.171738 | -0.330511 |
| 46 | 1 | 0 | 4.713139 | -1.821923 | -1.973706 |
| 47 | 6 | 0 | 3.597348 | -3.029591 | 1.560814  |
| 48 | 1 | 0 | 2.006706 | -1.565746 | 1.391110  |
| 49 | 6 | 0 | 4.725924 | -3.609621 | 0.945026  |
| 50 | 1 | 0 | 5.998915 | -3.612168 | -0.809673 |
| 51 | 1 | 0 | 3.287560 | -3.359461 | 2.549490  |
| 52 | 1 | 0 | 5.285842 | -4.390175 | 1.455166  |

---

Compound **3b** Transition State 1 = TS2

Method: b3lyp/LanL2DZ O

SCF Done: E(RB3LYP) = -1162.79933611 A.U. after 1 cycles

Lowest frequency = -21.9230

Zero-point correction= 0.427127 (Hartree/Particle)

Thermal correction to Energy= 0.450623

Thermal correction to Enthalpy= 0.451567

Thermal correction to Gibbs Free Energy= 0.370966

Sum of electronic and zero-point Energies= -1162.372209

Sum of electronic and thermal Energies= -1162.348713

Sum of electronic and thermal Enthalpies= -1162.347769

Sum of electronic and thermal Free Energies= -1162.428370

Standard orientation:

---

| Center<br>Number | Atomic<br>Number | Atomic<br>Type | Coordinates (Angstroms) |           |           |
|------------------|------------------|----------------|-------------------------|-----------|-----------|
|                  |                  |                | X                       | Y         | Z         |
| 1                | 45               | 0              | 0.138503                | 1.429270  | -0.168248 |
| 2                | 17               | 0              | -1.949883               | 2.198767  | -1.303673 |
| 3                | 7                | 0              | 0.542554                | -1.642057 | 0.680235  |
| 4                | 7                | 0              | -1.340068               | -1.414625 | -0.385725 |
| 5                | 6                | 0              | 0.440855                | 3.620332  | 0.315901  |
| 6                | 1                | 0              | -0.531175               | 4.078186  | 0.437616  |
| 7                | 6                | 0              | 1.097123                | 3.345502  | -0.889816 |
| 8                | 1                | 0              | 0.736493                | 3.552415  | -1.888567 |
| 9                | 6                | 0              | 1.603433                | 1.815819  | 1.377090  |
| 10               | 1                | 0              | 1.550185                | 1.204423  | 2.270059  |
| 11               | 6                | 0              | 2.282179                | 1.532883  | 0.143228  |
| 12               | 1                | 0              | 2.872937                | 0.661774  | -0.108952 |
| 13               | 6                | 0              | 1.471520                | 3.363706  | 1.446751  |
| 14               | 1                | 0              | 1.236083                | 3.785565  | 2.423872  |
| 15               | 6                | 0              | 2.542494                | 2.916951  | -0.518296 |
| 16               | 1                | 0              | 3.277646                | 2.936287  | -1.322836 |
| 17               | 6                | 0              | 2.797557                | 3.808441  | 0.742870  |
| 18               | 1                | 0              | 2.819657                | 4.881061  | 0.512250  |
| 19               | 1                | 0              | 3.698268                | 3.518419  | 1.298897  |
| 20               | 6                | 0              | -0.242265               | -0.665291 | 0.044819  |
| 21               | 6                | 0              | -1.236422               | -2.762268 | -0.021898 |
| 22               | 1                | 0              | -2.007724               | -3.478143 | -0.252227 |
| 23               | 6                | 0              | -0.055685               | -2.908263 | 0.641100  |
| 24               | 1                | 0              | 0.412235                | -3.780009 | 1.068301  |
| 25               | 6                | 0              | 1.874220                | -1.509199 | 1.296737  |

|    |   |   |           |           |           |
|----|---|---|-----------|-----------|-----------|
| 26 | 1 | 0 | 1.834348  | -1.959334 | 2.296945  |
| 27 | 1 | 0 | 2.084122  | -0.455437 | 1.430182  |
| 28 | 6 | 0 | 2.985721  | -2.170271 | 0.485213  |
| 29 | 6 | 0 | 4.014677  | -2.869801 | 1.148763  |
| 30 | 6 | 0 | 3.028854  | -2.056520 | -0.921433 |
| 31 | 6 | 0 | 5.077013  | -3.441159 | 0.422330  |
| 32 | 1 | 0 | 3.988938  | -2.969476 | 2.233003  |
| 33 | 6 | 0 | 4.086403  | -2.630924 | -1.648510 |
| 34 | 1 | 0 | 2.234730  | -1.529104 | -1.445120 |
| 35 | 6 | 0 | 5.115557  | -3.323094 | -0.979689 |
| 36 | 1 | 0 | 5.864378  | -3.978146 | 0.946008  |
| 37 | 1 | 0 | 4.108176  | -2.539061 | -2.731783 |
| 38 | 1 | 0 | 5.932623  | -3.766729 | -1.543407 |
| 39 | 6 | 0 | -2.522419 | -0.984007 | -1.182422 |
| 40 | 1 | 0 | -2.356308 | 0.046621  | -1.496279 |
| 41 | 1 | 0 | -2.555951 | -1.622527 | -2.074234 |
| 42 | 6 | 0 | -3.823173 | -1.103175 | -0.402982 |
| 43 | 6 | 0 | -4.097108 | -0.217590 | 0.663402  |
| 44 | 6 | 0 | -4.781987 | -2.078966 | -0.746551 |
| 45 | 6 | 0 | -5.300598 | -0.321989 | 1.381345  |
| 46 | 1 | 0 | -3.377717 | 0.560178  | 0.906106  |
| 47 | 6 | 0 | -5.992496 | -2.180965 | -0.032600 |
| 48 | 1 | 0 | -4.590331 | -2.752366 | -1.581387 |
| 49 | 6 | 0 | -6.251735 | -1.304895 | 1.037473  |
| 50 | 1 | 0 | -5.504611 | 0.368240  | 2.196695  |
| 51 | 1 | 0 | -6.726227 | -2.934134 | -0.311006 |
| 52 | 1 | 0 | -7.185117 | -1.379684 | 1.590943  |

---

Compound **3c** Ground State

Method: b3lyp/LanL2DZ

SCF Done: E(RB3LYP) = -1624.81891381 A.U. after 1 cycles

Lowest frequency = 23.7491

Zero-point correction= 0.589338 (Hartree/Particle)

Thermal correction to Energy= 0.622841

Thermal correction to Enthalpy= 0.623785

Thermal correction to Gibbs Free Energy= 0.522315

Sum of electronic and zero-point Energies= -1624.229576

Sum of electronic and thermal Energies= -1624.196073

Sum of electronic and thermal Enthalpies= -1624.195129

Sum of electronic and thermal Free Energies= -1624.296599

Standard orientation:

-----

| Center | Atomic | Atomic | Coordinates (Angstroms) |           |           |
|--------|--------|--------|-------------------------|-----------|-----------|
| Number | Number | Type   | X                       | Y         | Z         |
| 1      | 45     | 0      | 0.860890                | -1.595642 | -0.270403 |
| 2      | 17     | 0      | 2.262552                | -0.808452 | -2.188227 |
| 3      | 7      | 0      | -0.435959               | 1.272066  | 0.256604  |
| 4      | 7      | 0      | 1.682478                | 1.100717  | 0.791525  |
| 5      | 6      | 0      | 1.784666                | -3.665299 | -0.273771 |
| 6      | 1      | 0      | 2.770654                | -3.602816 | -0.716222 |
| 7      | 6      | 0      | 0.560931                | -3.745061 | -0.944147 |
| 8      | 1      | 0      | 0.397899                | -3.760374 | -2.013911 |

-----

|    |   |   |           |           |           |
|----|---|---|-----------|-----------|-----------|
| 9  | 6 | 0 | 0.705926  | -2.625062 | 1.612810  |
| 10 | 1 | 0 | 0.915632  | -2.048916 | 2.507252  |
| 11 | 6 | 0 | -0.550208 | -2.707003 | 0.929899  |
| 12 | 1 | 0 | -1.467169 | -2.203637 | 1.203856  |
| 13 | 6 | 0 | 1.484652  | -3.921319 | 1.231019  |
| 14 | 1 | 0 | 2.338487  | -4.179456 | 1.858197  |
| 15 | 6 | 0 | -0.516283 | -4.047251 | 0.136321  |
| 16 | 1 | 0 | -1.474556 | -4.417728 | -0.227033 |
| 17 | 6 | 0 | 0.307000  | -4.948318 | 1.118519  |
| 18 | 1 | 0 | 0.613048  | -5.903119 | 0.672009  |
| 19 | 1 | 0 | -0.204438 | -5.119103 | 2.074383  |
| 20 | 6 | 0 | 0.616172  | 0.355038  | 0.322927  |
| 21 | 6 | 0 | 1.322121  | 2.436158  | 1.006934  |
| 22 | 1 | 0 | 2.025847  | 3.182980  | 1.333074  |
| 23 | 6 | 0 | 0.003548  | 2.546897  | 0.677790  |
| 24 | 1 | 0 | -0.627567 | 3.414934  | 0.675848  |
| 25 | 6 | 0 | -1.907405 | 0.969284  | 0.007569  |
| 26 | 6 | 0 | 3.038766  | 0.554337  | 1.067077  |
| 27 | 1 | 0 | 3.106822  | -0.378624 | 0.500943  |
| 28 | 1 | 0 | 3.100795  | 0.319389  | 2.138137  |
| 29 | 6 | 0 | -2.577611 | 2.288498  | -0.526767 |
| 30 | 6 | 0 | -3.050581 | 3.269907  | 0.378333  |
| 31 | 6 | 0 | -2.687236 | 2.562894  | -1.906533 |
| 32 | 6 | 0 | -3.611374 | 4.474956  | -0.075701 |
| 33 | 1 | 0 | -2.988640 | 3.094064  | 1.448162  |
| 34 | 6 | 0 | -3.248977 | 3.769029  | -2.366059 |
| 35 | 1 | 0 | -2.353032 | 1.835508  | -2.635713 |
| 36 | 6 | 0 | -3.714215 | 4.733298  | -1.455581 |

|    |   |   |           |           |           |
|----|---|---|-----------|-----------|-----------|
| 37 | 1 | 0 | -3.965881 | 5.206736  | 0.646332  |
| 38 | 1 | 0 | -3.322918 | 3.948331  | -3.435921 |
| 39 | 1 | 0 | -4.150583 | 5.663407  | -1.811576 |
| 40 | 6 | 0 | -2.560588 | 0.563299  | 1.364004  |
| 41 | 6 | 0 | -3.969862 | 0.577527  | 1.500756  |
| 42 | 6 | 0 | -1.796898 | 0.172879  | 2.482586  |
| 43 | 6 | 0 | -4.590947 | 0.204570  | 2.703250  |
| 44 | 1 | 0 | -4.588374 | 0.904270  | 0.669564  |
| 45 | 6 | 0 | -2.414743 | -0.194782 | 3.693442  |
| 46 | 1 | 0 | -0.715031 | 0.153818  | 2.425915  |
| 47 | 6 | 0 | -3.814835 | -0.186260 | 3.811613  |
| 48 | 1 | 0 | -5.675777 | 0.226315  | 2.775217  |
| 49 | 1 | 0 | -1.797505 | -0.487938 | 4.539403  |
| 50 | 1 | 0 | -4.291930 | -0.470684 | 4.746270  |
| 51 | 6 | 0 | -2.048370 | -0.148461 | -1.066243 |
| 52 | 6 | 0 | -1.160074 | -0.196477 | -2.165027 |
| 53 | 6 | 0 | -3.118986 | -1.067505 | -1.041315 |
| 54 | 6 | 0 | -1.340740 | -1.124719 | -3.205489 |
| 55 | 1 | 0 | -0.310650 | 0.474359  | -2.219259 |
| 56 | 6 | 0 | -3.305786 | -1.993411 | -2.084113 |
| 57 | 1 | 0 | -3.810293 | -1.088447 | -0.208110 |
| 58 | 6 | 0 | -2.421278 | -2.024206 | -3.177288 |
| 59 | 1 | 0 | -0.619690 | -1.145379 | -4.017436 |
| 60 | 1 | 0 | -4.141897 | -2.687755 | -2.036894 |
| 61 | 1 | 0 | -2.564786 | -2.739387 | -3.983997 |
| 62 | 6 | 0 | 4.154634  | 1.511530  | 0.680920  |
| 63 | 6 | 0 | 4.943634  | 2.126382  | 1.675593  |
| 64 | 6 | 0 | 4.428165  | 1.776680  | -0.680219 |



|    |   |   |          |          |           |
|----|---|---|----------|----------|-----------|
| 65 | 6 | 0 | 5.991077 | 3.000160 | 1.322633  |
| 66 | 1 | 0 | 4.745371 | 1.918116 | 2.726382  |
| 67 | 6 | 0 | 5.470748 | 2.651361 | -1.032235 |
| 68 | 1 | 0 | 3.832569 | 1.283368 | -1.445530 |
| 69 | 6 | 0 | 6.254562 | 3.266440 | -0.034022 |
| 70 | 1 | 0 | 6.595637 | 3.465346 | 2.097909  |
| 71 | 1 | 0 | 5.678011 | 2.845464 | -2.081994 |
| 72 | 1 | 0 | 7.063222 | 3.939116 | -0.311089 |

-----

Compound **3c** Transition State 1

Method: b3lyp/LanL2DZ

SCF Done: E(RB3LYP) = -1624.78011288 A.U. after 1 cycles

Lowest frequency = -30.0559

Zero-point correction= 0.589301 (Hartree/Particle)

Thermal correction to Energy= 0.621965

Thermal correction to Enthalpy= 0.622910

Thermal correction to Gibbs Free Energy= 0.523694

Sum of electronic and zero-point Energies= -1624.190812

Sum of electronic and thermal Energies= -1624.158148

Sum of electronic and thermal Enthalpies= -1624.157203

Sum of electronic and thermal Free Energies= -1624.256419

Standard orientation:

-----

| Center | Atomic | Atomic | Coordinates (Angstroms) |   |   |
|--------|--------|--------|-------------------------|---|---|
| Number | Number | Type   | X                       | Y | Z |

---

|    |    |   |           |           |           |
|----|----|---|-----------|-----------|-----------|
| 1  | 45 | 0 | 1.128410  | -1.737402 | -0.196304 |
| 2  | 17 | 0 | 3.660005  | -1.803208 | -0.459956 |
| 3  | 7  | 0 | -0.454852 | 1.311815  | -0.229970 |
| 4  | 7  | 0 | 1.664850  | 1.399989  | -0.773394 |
| 5  | 6  | 0 | 1.552843  | -3.821210 | 0.495951  |
| 6  | 1  | 0 | 2.572895  | -3.875724 | 0.846827  |
| 7  | 6  | 0 | 1.118252  | -3.855208 | -0.844165 |
| 8  | 1  | 0 | 1.741002  | -3.970540 | -1.722072 |
| 9  | 6  | 0 | -0.396758 | -2.612125 | 1.099208  |
| 10 | 1  | 0 | -0.731419 | -1.963570 | 1.889836  |
| 11 | 6  | 0 | -0.857644 | -2.651224 | -0.248902 |
| 12 | 1  | 0 | -1.660836 | -2.075072 | -0.675949 |
| 13 | 6  | 0 | 0.287038  | -3.977002 | 1.369534  |
| 14 | 1  | 0 | 0.445145  | -4.243070 | 2.414566  |
| 15 | 6  | 0 | -0.423360 | -4.039064 | -0.799963 |
| 16 | 1  | 0 | -0.902236 | -4.368460 | -1.722207 |
| 17 | 6  | 0 | -0.579528 | -4.929371 | 0.478740  |
| 18 | 1  | 0 | -0.136085 | -5.927367 | 0.366404  |
| 19 | 1  | 0 | -1.620191 | -5.009545 | 0.819159  |
| 20 | 6  | 0 | 0.684237  | 0.467877  | -0.420566 |
| 21 | 6  | 0 | 1.199084  | 2.714907  | -0.742685 |
| 22 | 1  | 0 | 1.840019  | 3.556147  | -0.944167 |
| 23 | 6  | 0 | -0.114190 | 2.666411  | -0.406858 |
| 24 | 1  | 0 | -0.806072 | 3.474420  | -0.276377 |
| 25 | 6  | 0 | -1.911284 | 0.937299  | 0.030059  |
| 26 | 6  | 0 | -2.502182 | 0.181219  | -1.200679 |
| 27 | 6  | 0 | -3.898949 | -0.052025 | -1.263407 |

|    |   |   |           |           |           |
|----|---|---|-----------|-----------|-----------|
| 28 | 6 | 0 | -1.728350 | -0.192084 | -2.318068 |
| 29 | 6 | 0 | -4.487750 | -0.679778 | -2.372096 |
| 30 | 1 | 0 | -4.544610 | 0.305240  | -0.466788 |
| 31 | 6 | 0 | -2.316172 | -0.811998 | -3.437713 |
| 32 | 1 | 0 | -0.658628 | -0.030166 | -2.320656 |
| 33 | 6 | 0 | -3.696661 | -1.070993 | -3.469603 |
| 34 | 1 | 0 | -5.562406 | -0.845256 | -2.385025 |
| 35 | 1 | 0 | -1.686961 | -1.092408 | -4.278948 |
| 36 | 1 | 0 | -4.149469 | -1.551902 | -4.333170 |
| 37 | 6 | 0 | -2.754516 | 2.267742  | 0.161869  |
| 38 | 6 | 0 | -3.110175 | 2.820707  | 1.409416  |
| 39 | 6 | 0 | -3.159285 | 2.958788  | -1.007013 |
| 40 | 6 | 0 | -3.851691 | 4.016552  | 1.489212  |
| 41 | 1 | 0 | -2.825483 | 2.325910  | 2.329902  |
| 42 | 6 | 0 | -3.891277 | 4.153604  | -0.931646 |
| 43 | 1 | 0 | -2.897658 | 2.563222  | -1.983759 |
| 44 | 6 | 0 | -4.245841 | 4.691021  | 0.321897  |
| 45 | 1 | 0 | -4.117984 | 4.413870  | 2.465660  |
| 46 | 1 | 0 | -4.185010 | 4.660862  | -1.847338 |
| 47 | 1 | 0 | -4.819305 | 5.612659  | 0.384066  |
| 48 | 6 | 0 | -1.998952 | 0.192406  | 1.391757  |
| 49 | 6 | 0 | -3.042665 | -0.702417 | 1.706024  |
| 50 | 6 | 0 | -1.089342 | 0.533210  | 2.419186  |
| 51 | 6 | 0 | -3.181395 | -1.230259 | 3.003436  |
| 52 | 1 | 0 | -3.745400 | -1.021101 | 0.947558  |
| 53 | 6 | 0 | -1.218925 | 0.002740  | 3.714087  |
| 54 | 1 | 0 | -0.268176 | 1.210443  | 2.210129  |
| 55 | 6 | 0 | -2.274016 | -0.878827 | 4.018458  |

|    |   |   |           |           |           |
|----|---|---|-----------|-----------|-----------|
| 56 | 1 | 0 | -3.992574 | -1.923364 | 3.212687  |
| 57 | 1 | 0 | -0.497220 | 0.277540  | 4.479176  |
| 58 | 1 | 0 | -2.379972 | -1.287608 | 5.020143  |
| 59 | 6 | 0 | 3.037052  | 1.188958  | -1.321657 |
| 60 | 1 | 0 | 3.015231  | 1.543680  | -2.360555 |
| 61 | 1 | 0 | 3.247475  | 0.121234  | -1.318245 |
| 62 | 6 | 0 | 4.098362  | 1.943065  | -0.537143 |
| 63 | 6 | 0 | 4.767327  | 3.044912  | -1.110359 |
| 64 | 6 | 0 | 4.448256  | 1.532692  | 0.768799  |
| 65 | 6 | 0 | 5.763056  | 3.736471  | -0.392179 |
| 66 | 1 | 0 | 4.519869  | 3.356258  | -2.124770 |
| 67 | 6 | 0 | 5.435294  | 2.225796  | 1.490049  |
| 68 | 1 | 0 | 3.967006  | 0.657053  | 1.195579  |
| 69 | 6 | 0 | 6.094990  | 3.331008  | 0.913609  |
| 70 | 1 | 0 | 6.275573  | 4.580517  | -0.848400 |
| 71 | 1 | 0 | 5.702270  | 1.896991  | 2.491824  |
| 72 | 1 | 0 | 6.863405  | 3.861291  | 1.471839  |

-----

Compound **3c** Transition State 2

Method: b3lyp/LanL2DZ

SCF Done: E(RB3LYP) = -1624.77481776 A.U. after 1 cycles

Lowest frequency = -17.6133

Zero-point correction= 0.589310 (Hartree/Particle)

Thermal correction to Energy= 0.621789

Thermal correction to Enthalpy= 0.622733

Thermal correction to Gibbs Free Energy= 0.524529

Sum of electronic and zero-point Energies= -1624.185508  
 Sum of electronic and thermal Energies= -1624.153029  
 Sum of electronic and thermal Enthalpies= -1624.152085  
 Sum of electronic and thermal Free Energies= -1624.250288

Standard orientation:

```

-----
Center  Atomic  Atomic  Coordinates (Angstroms)
Number  Number  Type    X      Y      Z
-----
  1     45     0     1.322371 -1.466181 -0.030834
  2     17     0     -0.586976 -2.740959  0.895900
  3      7     0     -0.943240  0.877720 -0.755175
  4      7     0     1.059871  1.383842 -1.475369
  5      6     0     2.302625 -3.490695 -0.017022
  6      1     0     1.538745 -4.235208 -0.191339
  7      6     0     2.592220 -2.852121  1.198828
  8      1     0     2.100278 -3.013500  2.148325
  9      6     0     3.139813 -1.609922 -1.220257
 10      1     0     3.111760 -1.187483 -2.217613
 11      6     0     3.443156 -0.953749  0.020410
 12      1     0     3.718559  0.079282  0.185271
 13      6     0     3.445714 -3.115987 -0.993427
 14      1     0     3.542943 -3.730633 -1.888326
 15      6     0     3.918910 -2.078086  0.982524
 16      1     0     4.445914 -1.753814  1.879848
 17      6     0     4.661607 -3.032756 -0.011368
 18      1     0     4.916964 -4.002154  0.435397
  
```

|    |   |   |           |           |           |
|----|---|---|-----------|-----------|-----------|
| 19 | 1 | 0 | 5.550472  | -2.574569 | -0.464165 |
| 20 | 6 | 0 | 0.386165  | 0.381049  | -0.761629 |
| 21 | 6 | 0 | 0.210538  | 2.411678  | -1.891520 |
| 22 | 1 | 0 | 0.564184  | 3.271440  | -2.435880 |
| 23 | 6 | 0 | -1.032842 | 2.097516  | -1.447771 |
| 24 | 1 | 0 | -1.946726 | 2.645998  | -1.560525 |
| 25 | 6 | 0 | -2.175921 | 0.333563  | -0.019360 |
| 26 | 6 | 0 | -2.689075 | -0.962518 | -0.706130 |
| 27 | 6 | 0 | -3.931299 | -1.505837 | -0.303295 |
| 28 | 6 | 0 | -2.038429 | -1.551628 | -1.806006 |
| 29 | 6 | 0 | -4.476523 | -2.628622 | -0.943795 |
| 30 | 1 | 0 | -4.501442 | -1.029624 | 0.489343  |
| 31 | 6 | 0 | -2.589011 | -2.667256 | -2.462003 |
| 32 | 1 | 0 | -1.084429 | -1.168901 | -2.146896 |
| 33 | 6 | 0 | -3.805448 | -3.221504 | -2.029937 |
| 34 | 1 | 0 | -5.428261 | -3.030321 | -0.603176 |
| 35 | 1 | 0 | -2.055041 | -3.108895 | -3.300487 |
| 36 | 1 | 0 | -4.225951 | -4.090559 | -2.530711 |
| 37 | 6 | 0 | -3.347315 | 1.385703  | -0.177540 |
| 38 | 6 | 0 | -3.700885 | 2.292196  | 0.843192  |
| 39 | 6 | 0 | -4.085355 | 1.433668  | -1.386906 |
| 40 | 6 | 0 | -4.753929 | 3.212581  | 0.665879  |
| 41 | 1 | 0 | -3.173944 | 2.281926  | 1.789295  |
| 42 | 6 | 0 | -5.127424 | 2.355110  | -1.571037 |
| 43 | 1 | 0 | -3.847122 | 0.740607  | -2.188199 |
| 44 | 6 | 0 | -5.471257 | 3.253482  | -0.540879 |
| 45 | 1 | 0 | -5.009927 | 3.890783  | 1.476510  |
| 46 | 1 | 0 | -5.673738 | 2.365506  | -2.511208 |

|    |   |   |           |           |           |
|----|---|---|-----------|-----------|-----------|
| 47 | 1 | 0 | -6.285298 | 3.961736  | -0.675986 |
| 48 | 6 | 0 | -1.810926 | 0.243529  | 1.492562  |
| 49 | 6 | 0 | -2.398096 | -0.693678 | 2.363736  |
| 50 | 6 | 0 | -0.952987 | 1.217298  | 2.051795  |
| 51 | 6 | 0 | -2.143349 | -0.655917 | 3.745872  |
| 52 | 1 | 0 | -3.010945 | -1.493129 | 1.972819  |
| 53 | 6 | 0 | -0.688018 | 1.254754  | 3.431930  |
| 54 | 1 | 0 | -0.485782 | 1.962582  | 1.414301  |
| 55 | 6 | 0 | -1.288876 | 0.317908  | 4.292117  |
| 56 | 1 | 0 | -2.595465 | -1.407574 | 4.388499  |
| 57 | 1 | 0 | -0.019791 | 2.015425  | 3.830218  |
| 58 | 1 | 0 | -1.087530 | 0.339925  | 5.360748  |
| 59 | 6 | 0 | 2.500145  | 1.551988  | -1.750481 |
| 60 | 1 | 0 | 2.610673  | 1.810143  | -2.811216 |
| 61 | 1 | 0 | 2.996898  | 0.605843  | -1.598796 |
| 62 | 6 | 0 | 3.147242  | 2.636634  | -0.893316 |
| 63 | 6 | 0 | 4.030122  | 3.564548  | -1.482476 |
| 64 | 6 | 0 | 2.907102  | 2.703945  | 0.496893  |
| 65 | 6 | 0 | 4.671310  | 4.542563  | -0.697637 |
| 66 | 1 | 0 | 4.219802  | 3.525142  | -2.554193 |
| 67 | 6 | 0 | 3.543012  | 3.682408  | 1.280531  |
| 68 | 1 | 0 | 2.223073  | 1.996964  | 0.961014  |
| 69 | 6 | 0 | 4.428369  | 4.604501  | 0.687110  |
| 70 | 1 | 0 | 5.350278  | 5.252331  | -1.164305 |
| 71 | 1 | 0 | 3.350777  | 3.725396  | 2.349970  |
| 72 | 1 | 0 | 4.919025  | 5.360796  | 1.294985  |

---

Compound **3d** Ground State 1

Method: b3lyp/LanL2DZ

SCF Done: E(RB3LYP) = -1049.72619743 A.U. after 1 cycles

Lowest frequency = 29.9144

Zero-point correction= 0.429009 (Hartree/Particle)

Thermal correction to Energy= 0.453120

Thermal correction to Enthalpy= 0.454065

Thermal correction to Gibbs Free Energy= 0.374210

Sum of electronic and zero-point Energies= -1049.297188

Sum of electronic and thermal Energies= -1049.273077

Sum of electronic and thermal Enthalpies= -1049.272133

Sum of electronic and thermal Free Energies= -1049.351988

Standard orientation:

-----

| Center<br>Number | Atomic<br>Number | Atomic<br>Type | Coordinates (Angstroms) |           |           |
|------------------|------------------|----------------|-------------------------|-----------|-----------|
|                  |                  |                | X                       | Y         | Z         |
| 1                | 45               | 0              | -1.124237               | -0.548410 | 0.313886  |
| 2                | 17               | 0              | 0.071470                | -0.422501 | 2.469273  |
| 3                | 7                | 0              | 1.285637                | 0.731682  | -0.976067 |
| 4                | 7                | 0              | -0.067743               | 2.349144  | -0.390048 |
| 5                | 6                | 0              | -2.896308               | -1.849154 | 0.949037  |
| 6                | 1                | 0              | -3.192045               | -1.586788 | 1.956941  |
| 7                | 6                | 0              | -1.850822               | -2.692533 | 0.569654  |
| 8                | 1                | 0              | -1.161692               | -3.214227 | 1.221437  |
| 9                | 6                | 0              | -2.713853               | -0.656152 | -1.147087 |

-----



|    |   |   |           |           |           |
|----|---|---|-----------|-----------|-----------|
| 10 | 1 | 0 | -3.007695 | 0.257182  | -1.650681 |
| 11 | 6 | 0 | -1.640511 | -1.523180 | -1.531739 |
| 12 | 1 | 0 | -0.971836 | -1.375600 | -2.372574 |
| 13 | 6 | 0 | -3.710971 | -1.545530 | -0.342206 |
| 14 | 1 | 0 | -4.714150 | -1.142855 | -0.198788 |
| 15 | 6 | 0 | -2.002528 | -2.929004 | -0.960990 |
| 16 | 1 | 0 | -1.458269 | -3.777844 | -1.375980 |
| 17 | 6 | 0 | -3.562965 | -2.908979 | -1.100234 |
| 18 | 1 | 0 | -4.050389 | -3.743661 | -0.580803 |
| 19 | 1 | 0 | -3.899344 | -2.857854 | -2.143396 |
| 20 | 6 | 0 | 0.049646  | 0.966369  | -0.398040 |
| 21 | 6 | 0 | 1.073271  | 2.939322  | -0.974960 |
| 22 | 1 | 0 | 1.204802  | 4.002085  | -1.069084 |
| 23 | 6 | 0 | 1.918894  | 1.928251  | -1.332551 |
| 24 | 1 | 0 | 2.904632  | 1.957970  | -1.766117 |
| 25 | 6 | 0 | 1.890995  | -0.608033 | -1.167964 |
| 26 | 1 | 0 | 1.937047  | -0.818991 | -2.244807 |
| 27 | 1 | 0 | 1.195125  | -1.316007 | -0.705883 |
| 28 | 6 | 0 | 3.278814  | -0.729901 | -0.556261 |
| 29 | 6 | 0 | 4.397499  | -0.988757 | -1.374633 |
| 30 | 6 | 0 | 3.453456  | -0.610868 | 0.841401  |
| 31 | 6 | 0 | 5.681262  | -1.126356 | -0.810180 |
| 32 | 1 | 0 | 4.267835  | -1.089088 | -2.451743 |
| 33 | 6 | 0 | 4.734883  | -0.745185 | 1.402806  |
| 34 | 1 | 0 | 2.589621  | -0.426150 | 1.478087  |
| 35 | 6 | 0 | 5.852064  | -1.002532 | 0.581101  |
| 36 | 1 | 0 | 6.537508  | -1.328867 | -1.449596 |
| 37 | 1 | 0 | 4.860519  | -0.657318 | 2.479345  |

|    |   |   |           |           |           |
|----|---|---|-----------|-----------|-----------|
| 38 | 1 | 0 | 6.841159  | -1.108836 | 1.021027  |
| 39 | 6 | 0 | -1.249718 | 3.167431  | 0.085618  |
| 40 | 6 | 0 | -2.205715 | 3.372637  | -1.117347 |
| 41 | 1 | 0 | -3.056842 | 3.997639  | -0.819623 |
| 42 | 1 | 0 | -1.690665 | 3.866386  | -1.951209 |
| 43 | 1 | 0 | -2.591642 | 2.410981  | -1.470867 |
| 44 | 6 | 0 | -0.741728 | 4.540504  | 0.595176  |
| 45 | 1 | 0 | -0.349863 | 5.173637  | -0.209975 |
| 46 | 1 | 0 | -1.581444 | 5.078609  | 1.048758  |
| 47 | 1 | 0 | 0.034498  | 4.414062  | 1.358800  |
| 48 | 6 | 0 | -1.974306 | 2.456697  | 1.247179  |
| 49 | 1 | 0 | -2.384994 | 1.488933  | 0.937251  |
| 50 | 1 | 0 | -1.297199 | 2.269233  | 2.086641  |
| 51 | 1 | 0 | -2.802430 | 3.092258  | 1.586462  |

-----

Compound **3d** Transition State 1

Method: b3lyp/LanL2DZ

SCF Done: E(RB3LYP) = -1049.68940508 A.U. after 1 cycles

Lowest frequency = -28.9196

Zero-point correction= 0.430049 (Hartree/Particle)

Thermal correction to Energy= 0.453056

Thermal correction to Enthalpy= 0.454000

Thermal correction to Gibbs Free Energy= 0.377179

Sum of electronic and zero-point Energies= -1049.259356

Sum of electronic and thermal Energies= -1049.236349

Sum of electronic and thermal Enthalpies= -1049.235405

Sum of electronic and thermal Free Energies= -1049.312226

Standard orientation:

---

| Center<br>Number | Atomic<br>Number | Atomic<br>Type | Coordinates (Angstroms) |           |           |
|------------------|------------------|----------------|-------------------------|-----------|-----------|
|                  |                  |                | X                       | Y         | Z         |
| 1                | 45               | 0              | -1.143308               | -0.843579 | -0.054700 |
| 2                | 17               | 0              | -3.501906               | -0.329552 | 0.666208  |
| 3                | 7                | 0              | 1.093772                | 1.321953  | -0.956501 |
| 4                | 7                | 0              | -0.650520               | 2.469852  | -0.314295 |
| 5                | 6                | 0              | -2.017866               | -2.894603 | -0.303571 |
| 6                | 1                | 0              | -3.052131               | -2.797464 | -0.601492 |
| 7                | 6                | 0              | -1.502694               | -2.781658 | 0.999161  |
| 8                | 1                | 0              | -2.065230               | -2.588413 | 1.902248  |
| 9                | 6                | 0              | 0.083530                | -2.229340 | -1.205126 |
| 10               | 1                | 0              | 0.495248                | -1.858039 | -2.135612 |
| 11               | 6                | 0              | 0.617439                | -2.116479 | 0.122294  |
| 12               | 1                | 0              | 1.543398                | -1.654235 | 0.436597  |
| 13               | 6                | 0              | -0.870714               | -3.454283 | -1.180812 |
| 14               | 1                | 0              | -1.154182               | -3.866006 | -2.149314 |
| 15               | 6                | 0              | -0.032408               | -3.271825 | 0.933783  |
| 16               | 1                | 0              | 0.441344                | -3.520755 | 1.883303  |
| 17               | 6                | 0              | -0.138609               | -4.387113 | -0.159455 |
| 18               | 1                | 0              | -0.753294               | -5.239526 | 0.156617  |
| 19               | 1                | 0              | 0.840055                | -4.733362 | -0.516230 |
| 20               | 6                | 0              | -0.210568               | 1.137259  | -0.460946 |
| 21               | 6                | 0              | 0.337477                | 3.383584  | -0.708652 |

|    |   |   |           |           |           |
|----|---|---|-----------|-----------|-----------|
| 22 | 1 | 0 | 0.205381  | 4.447623  | -0.680780 |
| 23 | 6 | 0 | 1.423982  | 2.670131  | -1.106252 |
| 24 | 1 | 0 | 2.388676  | 2.993692  | -1.460719 |
| 25 | 6 | 0 | 2.128281  | 0.332310  | -1.306046 |
| 26 | 1 | 0 | 2.465138  | 0.541722  | -2.329723 |
| 27 | 1 | 0 | 1.677007  | -0.648205 | -1.316285 |
| 28 | 6 | 0 | 3.329634  | 0.352254  | -0.364158 |
| 29 | 6 | 0 | 4.625506  | 0.152696  | -0.883378 |
| 30 | 6 | 0 | 3.167024  | 0.519720  | 1.028220  |
| 31 | 6 | 0 | 5.742586  | 0.110677  | -0.027363 |
| 32 | 1 | 0 | 4.765008  | 0.029318  | -1.956459 |
| 33 | 6 | 0 | 4.282260  | 0.483145  | 1.883962  |
| 34 | 1 | 0 | 2.174138  | 0.686876  | 1.439379  |
| 35 | 6 | 0 | 5.573776  | 0.276032  | 1.360260  |
| 36 | 1 | 0 | 6.736324  | -0.044371 | -0.440894 |
| 37 | 1 | 0 | 4.144488  | 0.614861  | 2.954530  |
| 38 | 1 | 0 | 6.435118  | 0.247806  | 2.023216  |
| 39 | 6 | 0 | -1.998131 | 2.982782  | 0.190376  |
| 40 | 6 | 0 | -2.190701 | 2.500778  | 1.647448  |
| 41 | 1 | 0 | -2.106489 | 1.420109  | 1.737025  |
| 42 | 1 | 0 | -1.445291 | 2.984355  | 2.294951  |
| 43 | 1 | 0 | -3.191743 | 2.777031  | 1.998606  |
| 44 | 6 | 0 | -3.089478 | 2.548265  | -0.815717 |
| 45 | 1 | 0 | -4.078390 | 2.828720  | -0.434665 |
| 46 | 1 | 0 | -2.925201 | 3.057447  | -1.776101 |
| 47 | 1 | 0 | -3.097216 | 1.471210  | -0.968803 |
| 48 | 6 | 0 | -2.002331 | 4.535485  | 0.226720  |
| 49 | 1 | 0 | -1.891964 | 4.984369  | -0.768242 |

|    |   |   |           |          |          |
|----|---|---|-----------|----------|----------|
| 50 | 1 | 0 | -2.979638 | 4.842672 | 0.614439 |
| 51 | 1 | 0 | -1.240011 | 4.944496 | 0.901470 |

-----

Compound **3d** Transition State 2

Method: b3lyp/LanL2DZ

SCF Done: E(RB3LYP) = -1049.68067717 A.U. after 1 cycles

Lowest frequency = -32.6543

Zero-point correction= 0.429922 (Hartree/Particle)

Thermal correction to Energy= 0.452995

Thermal correction to Enthalpy= 0.453939

Thermal correction to Gibbs Free Energy= 0.377106

Sum of electronic and zero-point Energies= -1049.250756

Sum of electronic and thermal Energies= -1049.227683

Sum of electronic and thermal Enthalpies= -1049.226738

Sum of electronic and thermal Free Energies= -1049.303571

Standard orientation:

-----

| Center | Atomic | Atomic | Coordinates (Angstroms) |   |   |
|--------|--------|--------|-------------------------|---|---|
| Number | Number | Type   | X                       | Y | Z |

-----

|   |    |   |           |           |           |
|---|----|---|-----------|-----------|-----------|
| 1 | 45 | 0 | -1.129622 | -0.800371 | -0.146920 |
|---|----|---|-----------|-----------|-----------|

|   |    |   |          |           |           |
|---|----|---|----------|-----------|-----------|
| 2 | 17 | 0 | 0.669759 | -2.576399 | -0.110244 |
|---|----|---|----------|-----------|-----------|

|   |   |   |          |          |           |
|---|---|---|----------|----------|-----------|
| 3 | 7 | 0 | 1.543936 | 0.943281 | -0.299019 |
|---|---|---|----------|----------|-----------|

|   |   |   |           |          |          |
|---|---|---|-----------|----------|----------|
| 4 | 7 | 0 | -0.023147 | 2.390932 | 0.213459 |
|---|---|---|-----------|----------|----------|

|   |   |   |           |           |          |
|---|---|---|-----------|-----------|----------|
| 5 | 6 | 0 | -2.351834 | -2.583565 | 0.459369 |
|---|---|---|-----------|-----------|----------|

|   |   |   |           |           |          |
|---|---|---|-----------|-----------|----------|
| 6 | 1 | 0 | -1.692467 | -3.332796 | 0.871780 |
|---|---|---|-----------|-----------|----------|

|    |   |   |           |           |           |
|----|---|---|-----------|-----------|-----------|
| 7  | 6 | 0 | -2.579185 | -2.315234 | -0.902563 |
| 8  | 1 | 0 | -2.149481 | -2.838530 | -1.747289 |
| 9  | 6 | 0 | -2.909172 | -0.342237 | 0.998817  |
| 10 | 1 | 0 | -2.756679 | 0.353890  | 1.810217  |
| 11 | 6 | 0 | -3.162871 | -0.056030 | -0.383493 |
| 12 | 1 | 0 | -3.326567 | 0.913200  | -0.829736 |
| 13 | 6 | 0 | -3.417929 | -1.785924 | 1.246116  |
| 14 | 1 | 0 | -3.573489 | -2.074014 | 2.285559  |
| 15 | 6 | 0 | -3.797368 | -1.352724 | -0.962756 |
| 16 | 1 | 0 | -4.297834 | -1.259982 | -1.926847 |
| 17 | 6 | 0 | -4.633243 | -1.854491 | 0.262136  |
| 18 | 1 | 0 | -5.017762 | -2.874242 | 0.132796  |
| 19 | 1 | 0 | -5.448048 | -1.170538 | 0.532844  |
| 20 | 6 | 0 | 0.152246  | 1.034713  | -0.172882 |
| 21 | 6 | 0 | 1.222558  | 3.015710  | 0.413400  |
| 22 | 1 | 0 | 1.333617  | 4.024631  | 0.760790  |
| 23 | 6 | 0 | 2.190454  | 2.117215  | 0.090553  |
| 24 | 1 | 0 | 3.263361  | 2.205919  | 0.099765  |
| 25 | 6 | 0 | 2.338935  | -0.061673 | -1.071159 |
| 26 | 1 | 0 | 2.506657  | 0.375334  | -2.065086 |
| 27 | 1 | 0 | 1.736512  | -0.962253 | -1.174288 |
| 28 | 6 | 0 | 3.674317  | -0.380979 | -0.419544 |
| 29 | 6 | 0 | 4.880293  | -0.050007 | -1.072601 |
| 30 | 6 | 0 | 3.729715  | -1.033997 | 0.832388  |
| 31 | 6 | 0 | 6.124938  | -0.359946 | -0.488784 |
| 32 | 1 | 0 | 4.848027  | 0.443307  | -2.043341 |
| 33 | 6 | 0 | 4.969969  | -1.335712 | 1.420409  |
| 34 | 1 | 0 | 2.803062  | -1.324577 | 1.318684  |

|    |   |   |           |           |           |
|----|---|---|-----------|-----------|-----------|
| 35 | 6 | 0 | 6.171889  | -0.999922 | 0.763443  |
| 36 | 1 | 0 | 7.046782  | -0.104210 | -1.006424 |
| 37 | 1 | 0 | 5.000970  | -1.844240 | 2.381302  |
| 38 | 1 | 0 | 7.129959  | -1.240618 | 1.218891  |
| 39 | 6 | 0 | -1.277145 | 3.255468  | 0.116414  |
| 40 | 6 | 0 | -2.310696 | 2.912746  | 1.213312  |
| 41 | 1 | 0 | -2.913601 | 2.049453  | 0.955495  |
| 42 | 1 | 0 | -1.808493 | 2.726989  | 2.170149  |
| 43 | 1 | 0 | -2.993603 | 3.760752  | 1.346435  |
| 44 | 6 | 0 | -1.842931 | 3.097244  | -1.318691 |
| 45 | 1 | 0 | -2.835944 | 3.559963  | -1.386826 |
| 46 | 1 | 0 | -1.182385 | 3.592638  | -2.041495 |
| 47 | 1 | 0 | -1.914107 | 2.046596  | -1.601348 |
| 48 | 6 | 0 | -0.908869 | 4.752975  | 0.305749  |
| 49 | 1 | 0 | -0.158158 | 5.096245  | -0.414205 |
| 50 | 1 | 0 | -1.818853 | 5.338681  | 0.134861  |
| 51 | 1 | 0 | -0.564363 | 4.972611  | 1.323993  |

---

**Catalysis: additional graphs and experimental data**

**Reaction conditions: catalyst loading 1%, T = 25 °C**

Fig. 3S-6S describe the reaction profiles of conversion for **3a**, **3d**, **4** and **5** with TolC≡CH, nBuC≡CH, Et<sub>3</sub>SiC≡CH and (CPh<sub>2</sub>OH)C≡CH, which confirm that catalyst **4** leads to reaction rates higher than all the other complexes employed.

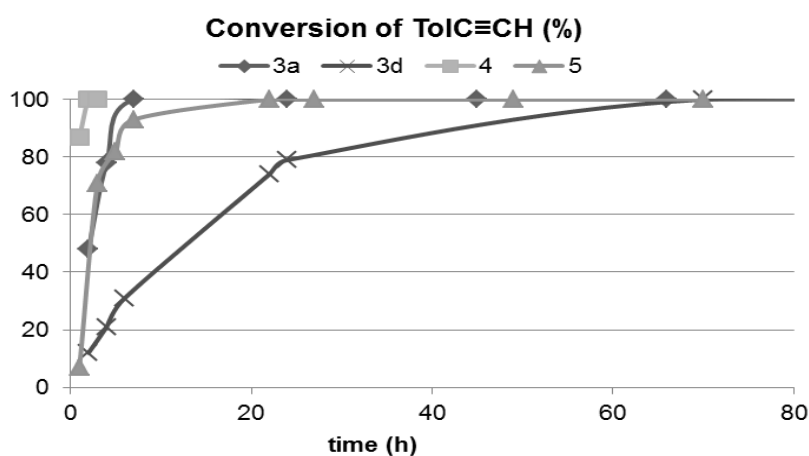

**Fig. 3S.** Reaction profile of conversion vs time for the hydrosilylation of TolC≡CH with complexes: **3a**, **3d**, **4** and **5** at 25°C with a catalyst loading of 1%.

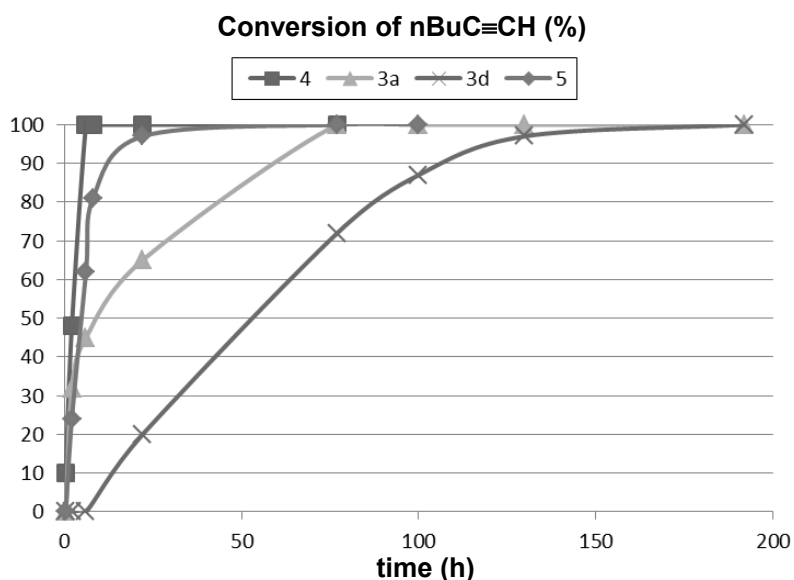

**Fig. 4S.** Reaction profile of conversion vs time for the hydrosilylation of nBuC≡CH with complexes: **3a**, **3d**, **4** and **5** at 25°C with a catalyst loading of 1%.



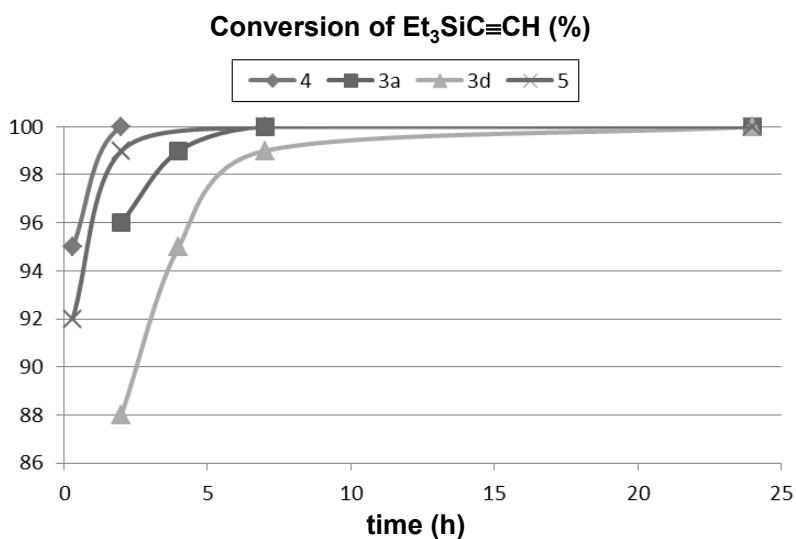

**Fig. 5S.** Reaction profile of conversion vs time for the hydrosilylation of Et<sub>3</sub>SiC≡CH with complexes: **3a**, **3d**, **4** and **5** at 25°C with a catalyst loading of 1%.

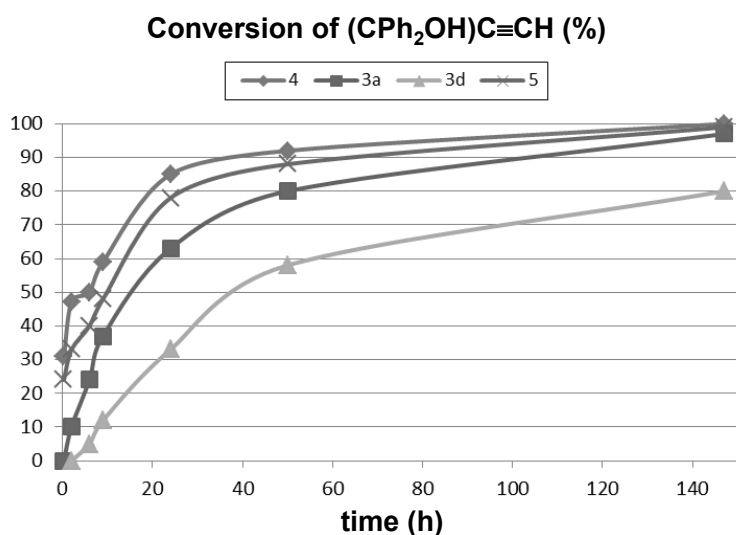

**Fig. 6S.** Reaction profile of conversion vs time for the hydrosilylation of (CPh<sub>2</sub>OH)C≡CH with complexes: **3a**, **3d**, **4** and **5** at 25°C with a catalyst loading of 1%.

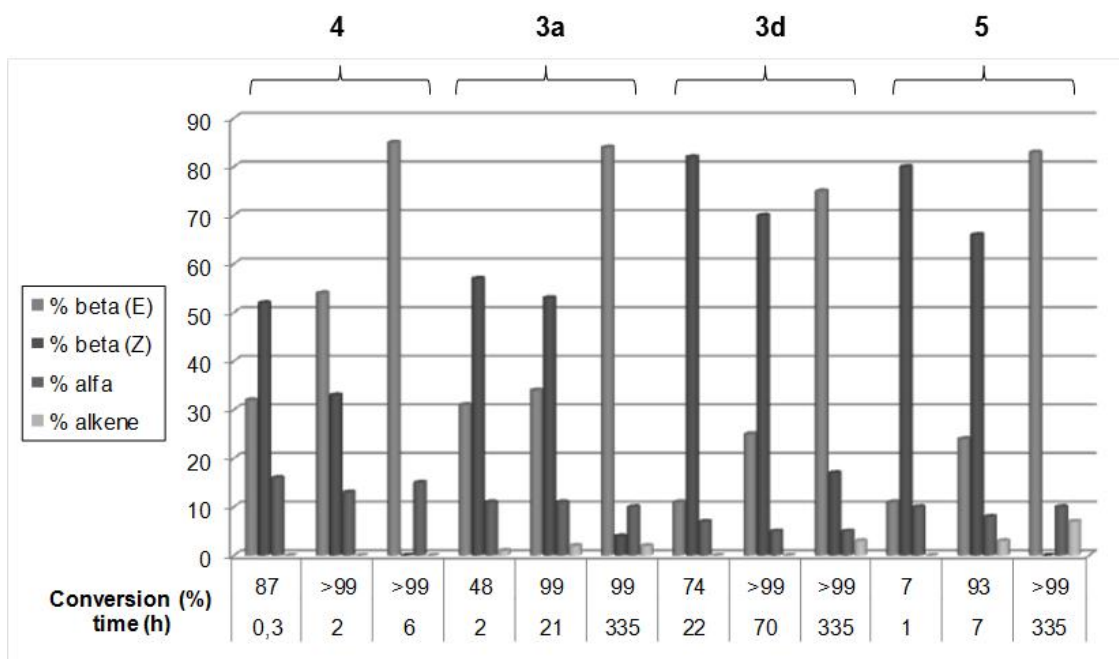

**Fig. 7S** Selectivity vs conversion and time for the hydrosilylation of tolylacetylene catalyzed by **3a**, **3d**, **4** and **5**. Catalyst loading of 1%.

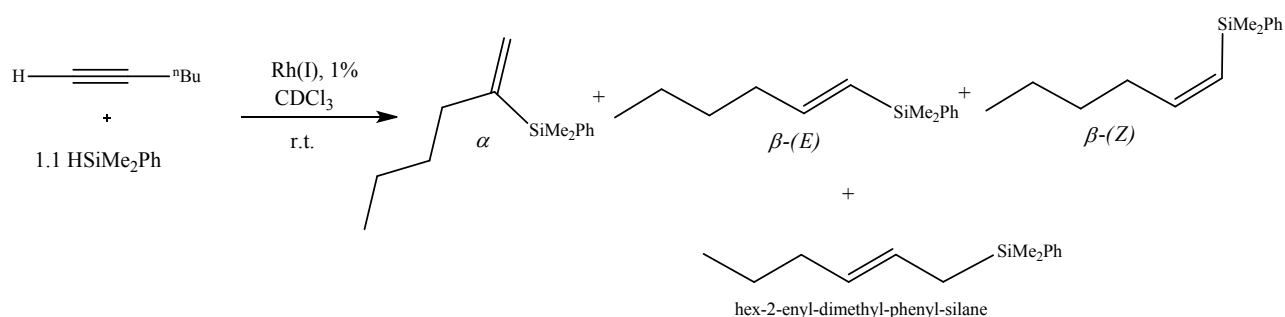

**Scheme 1S** Hydrosilylation of  $n\text{BuC}\equiv\text{CH}$  with  $\text{Rh(I)}$  complexes.

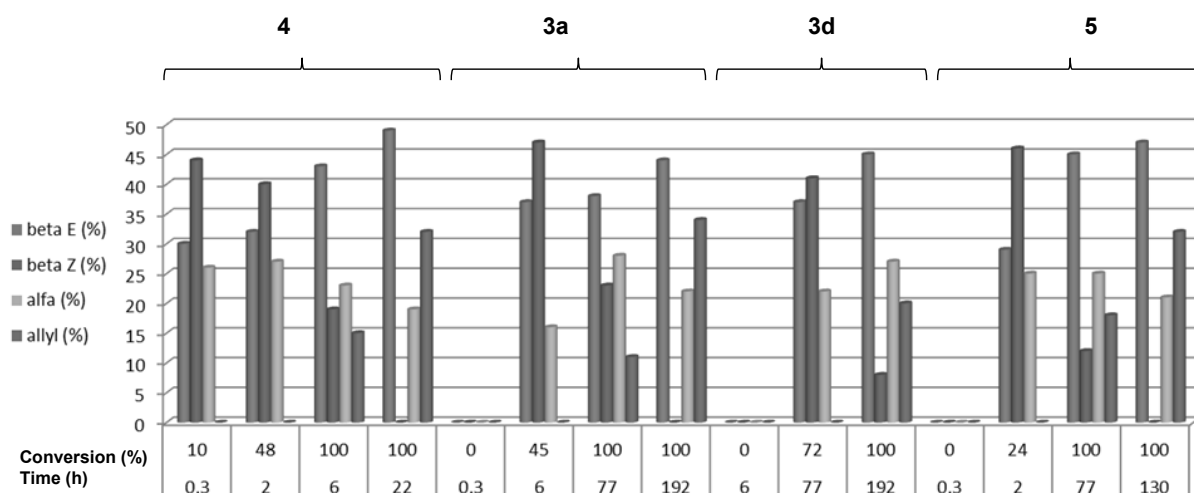

**Fig. 8S** Selectivity vs. conversion and time for the hydrosilylation of  $n\text{BuC}\equiv\text{CH}$  catalyzed by **3a**, **3d**, **4** and **5**. Catalyst loading of 1%.

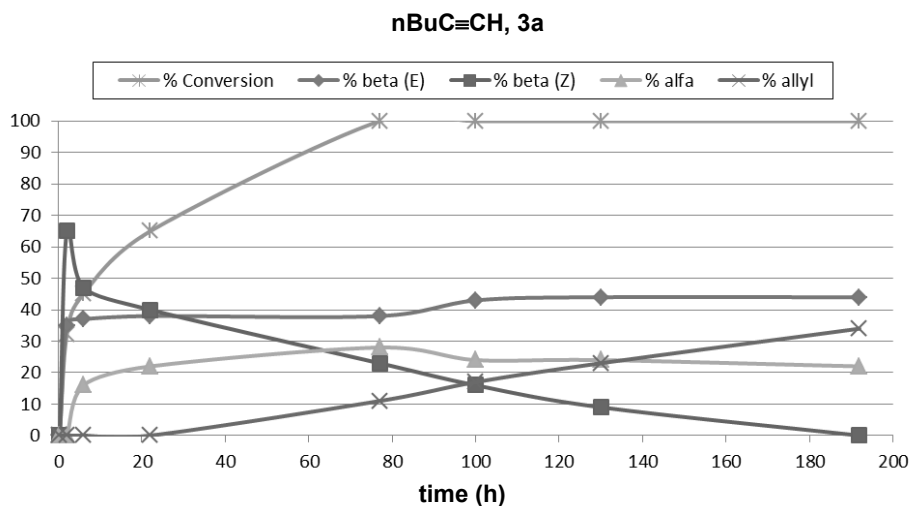

**Fig. 9S** Reaction profile of conversion and selectivity vs. time for the hydrosilylation of nBuC≡CH with **3a**; catalyst loading 1%.

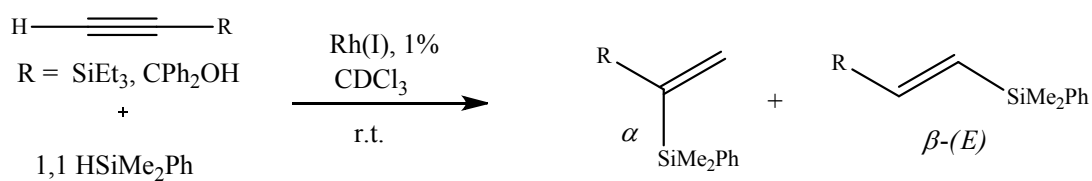

**Scheme 2S** Hydrosilylation of Et<sub>3</sub>SiC≡CH and (CPh<sub>2</sub>OH)C≡CH with Rh(I) complexes.

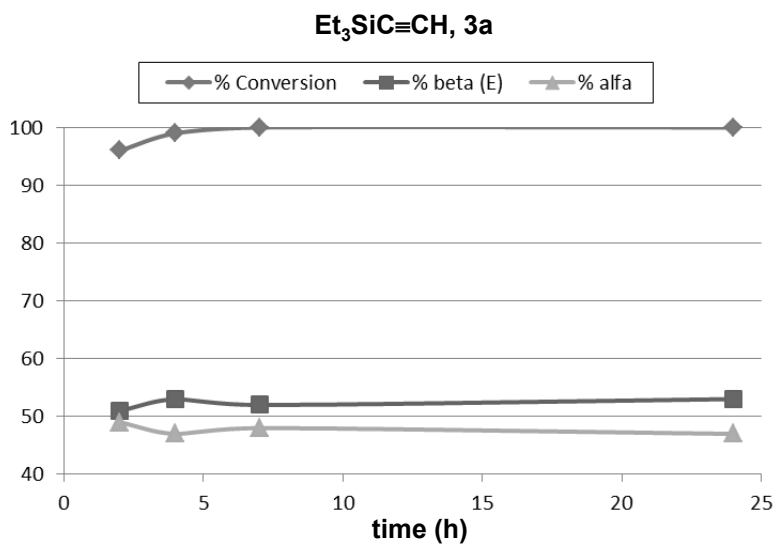

**Fig. 10S** Reaction profile of conversion and selectivity vs. time for the hydrosilylation of Et<sub>3</sub>SiC≡CH with **3a**; catalyst loading 1%.

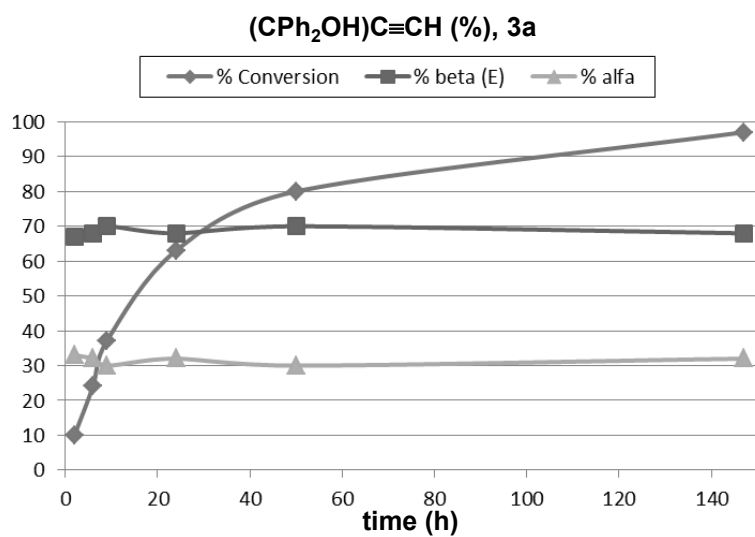

**Fig. 11S** Reaction profile of conversion and selectivity vs. time for the hydrosilylation of (CPh<sub>2</sub>OH)C≡CH with **3a**; catalyst loading 1%.

Reaction conditions: catalyst loading 0.1%, T = 25 °C

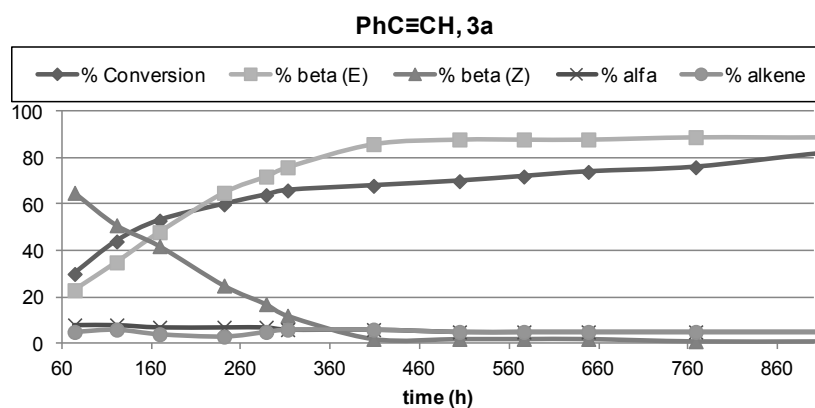

**Fig. 12S** Reaction profile of conversion and selectivities vs time for the hydrosilylation of PhC≡CH with **3a** (T = 25°C, catalyst loading = 0.1 %). Due to the long induction time and for sake of clarity, graphs start from a reaction time of 60 h.

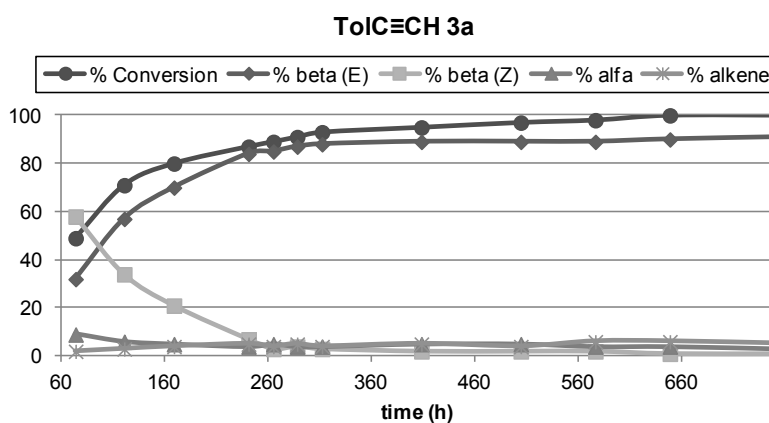

**Fig. 13S** Reaction profile of conversion and selectivities vs time for the hydrosilylation of TolC≡CH with **3a** (T = 25°C, catalyst loading = 0.1 %). Graphs start from a reaction time of 60 h for the sake of clarity due to the long induction time.

Reaction conditions: catalyst loading 0.1%, T = 60 °C

PhC≡CH, 3a

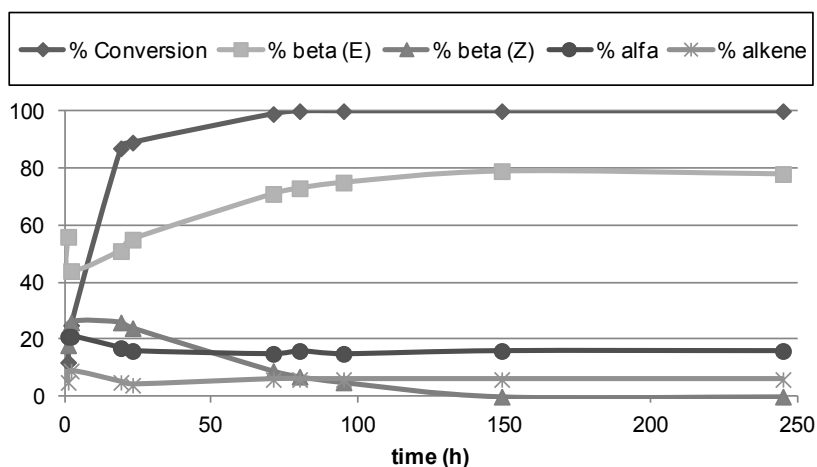

Fig. 14S Reaction profile of conversion and selectivities vs time for the PhC≡CH hydrosilylation of with 3a (T = 60°C, catalyst loading = 0.1 %).

TolC≡CH, 3a

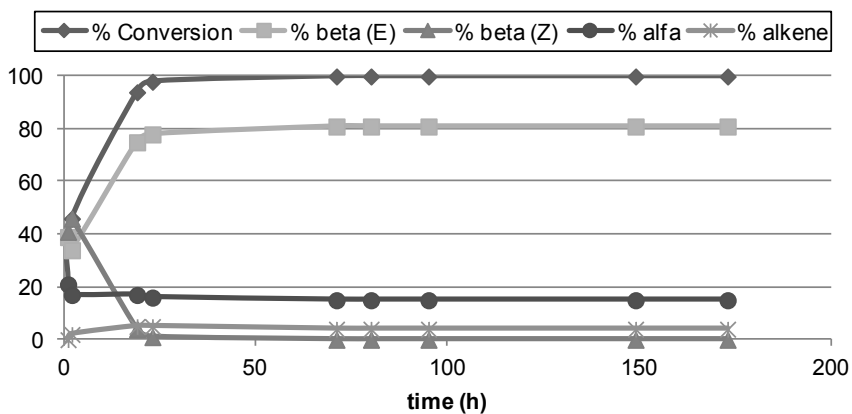

Fig. 15S Reaction profile of conversion and selectivities vs time for the hydrosilylation of TolC≡CH with 3a (T = 60°C, catalyst loading = 0.1 %).

## Details and full characterization data for the catalysis

**Hydrosilylation products:  $^1\text{H-NMR}$  characterizations and selected examples of conversions and selectivities calculations from  $^1\text{H-NMR}$ .**

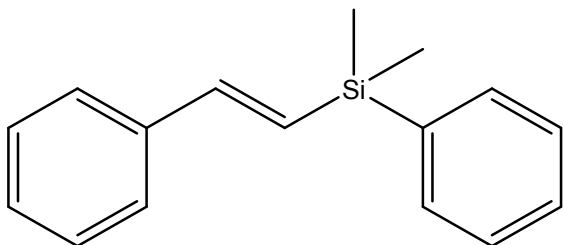

### **(*E*)-2- (dimethyl(phenyl)silyl)-1-phenyl-ethene<sup>8</sup>**

$^1\text{H NMR}$  (300.1 MHz,  $\text{CDCl}_3$ ):  $\delta$  7.6-7.2 (m, 5H), 7.0 (d,  $J_{\text{H,H}} = 19$  Hz, 1H), 6.6 (d,  $J_{\text{H,H}} = 19$  Hz, 1H), 0.36 (s, 6H) ppm.

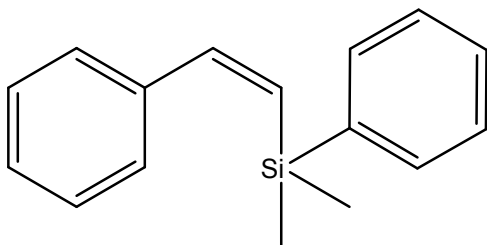

### **(*Z*)-2- (dimethyl(phenyl)silyl)-1-phenyl-ethene<sup>9</sup>**

$^1\text{H NMR}$  (300.1 MHz,  $\text{CDCl}_3$ ):  $\delta$  7.6-7.2 (m, 5H), 7.5 (d,  $J_{\text{H,H}} = 15$  Hz, 1H), 6.0 (d,  $J_{\text{H,H}} = 15$  Hz, 1H), 0.36 (s, 6H) ppm.

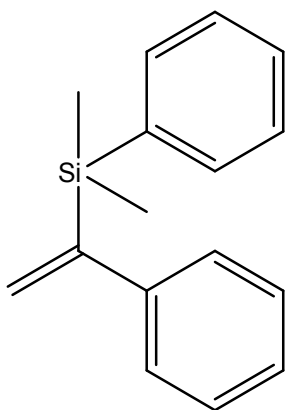

### **1-(dimethyl(phenyl)silyl)-1-phenyl-ethene<sup>8</sup>**

$^1\text{H NMR}$  (300.1 MHz,  $\text{CDCl}_3$ ):  $\delta$  7.6-7.3 (m, 5H), 5.98 (d,  $J_{\text{H,H}} = 2.9$  Hz, 1H), 5.66 (d,  $J_{\text{H,H}} = 2.9$  Hz, 1H), 0.41 (s, 6H) ppm.

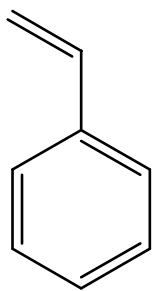

**Styrene**

$^1\text{H}$  NMR (300.1 MHz,  $\text{CDCl}_3$ ):  $\delta$  7.50-7.10 (m, 5H), 6.69 (dd,  $J_{\text{H,H}} = 18.0, 11.0$  Hz, 1H), 5.74 (d,  $J_{\text{H,H}} = 18.0$ , 1H), 5.22 (d,  $J_{\text{H,H}} = 11.0$  Hz, 1H).

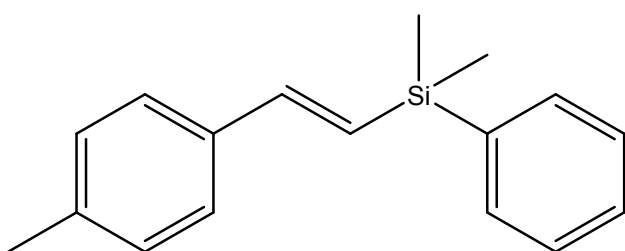

**(E)-2- (dimethyl(phenyl)silyl)-1-tolyl-ethene**

$^1\text{H}$ -NMR (300.1 MHz,  $\text{CDCl}_3$ ):  $\delta$  7.60-7.16 (m, 9H), 6.96 (d,  $J_{\text{H,H}} = 19.2$  Hz, 1H), 6.45 (d,  $J_{\text{H,H}} = 19.2$  Hz, 1H), 2.36 (s, 3H), 0.49 (s, 6H) ppm.

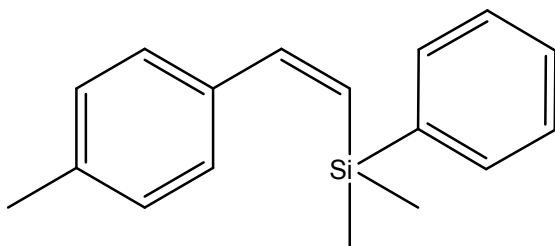

**(Z)-2- (dimethyl(phenyl)silyl)-1-tolyl-ethene<sup>10</sup>**

$^1\text{H}$ -NMR (300.1 MHz,  $\text{CDCl}_3$ ):  $\delta$  7.60–7.52 (m, 2H), 7.43 (d,  $J_{\text{H,H}} = 15.3$  Hz, 1H), 7.38–7.32 (m, 3H), 7.13 (d,  $J_{\text{H,H}} = 8.1$  Hz, 2H), 7.06 (d,  $J_{\text{H,H}} = 8.1$  Hz, 2H), 5.96 (d,  $J_{\text{H,H}} = 15.0$  Hz, 1H), 2.30 (s, 3H), 0.28 (s, 6H) ppm.

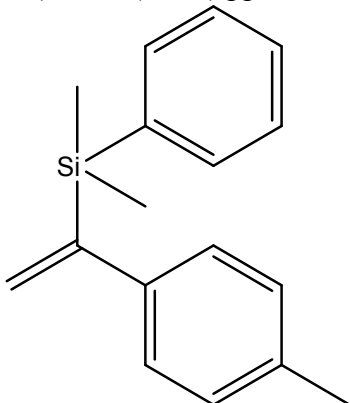



### 1-(dimethyl(phenyl)silyl)-1-tolyl-ethene

$^1\text{H NMR}$  (300.1 MHz,  $\text{CDCl}_3$ ):  $\delta$  7.6-7.3 (m, 4H), 5.93 (d, 1H,  $J_{\text{H,H}} = 2.9$  Hz), 5.66 (d, 1H,  $J_{\text{H,H}} = 2.9$  Hz), 2.35 (s, 3H), 0.30 (s, 6H) ppm.

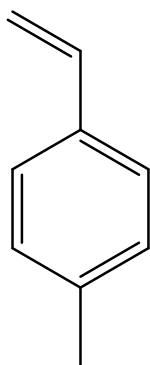

### 4-Methylstyrene

$^1\text{H NMR}$  (300.1 MHz,  $\text{CDCl}_3$ ):  $\delta$  7.39 (d,  $J_{\text{H,H}} = 8.0$  Hz, 2H), 7.20 (d,  $J_{\text{H,H}} = 8.0$  Hz, 2H), 6.77 (dd,  $J_{\text{H,H}} = 18.0, 11.0$  Hz, 1H), 5.78 (d,  $J_{\text{H,H}} = 18.0$ , 1H), 5.26 (d,  $J_{\text{H,H}} = 11.0$  Hz, 1H), 2.41 (s, 3H).

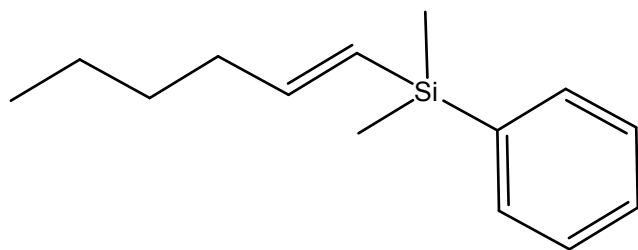

### (E)-2-(dimethyl(phenyl)silyl)-1-hexene<sup>11</sup>

$^1\text{H NMR}$  (300.1 MHz,  $\text{CDCl}_3$ ):  $\delta$  7.70-7.30 (m, 5H, Ph), 6.12 (dt, 1H,  $J_{\text{H,H}} = 19$  Hz, 6.2 Hz,  $\text{CH}_2\text{CH}=\text{}$ ), 5.72 (d, 1H,  $J_{\text{H,H}} = 19$  Hz,  $\text{SiCH}=\text{}$ ), 2.22-0.80 (m, 9H,  $^n\text{Bu}$ ), 0.30 (s, 6H,  $\text{SiMe}_2$ ).

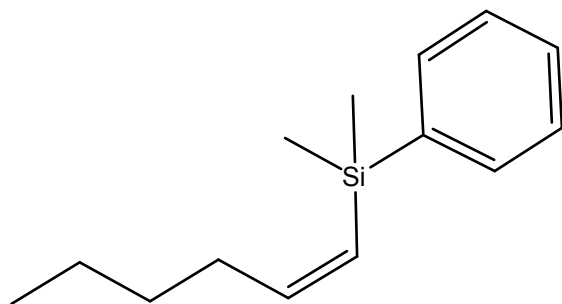

### (Z)-2-(dimethyl(phenyl)silyl)-2-hexene<sup>11</sup>

$^1\text{H NMR}$  (300.1 MHz,  $\text{CDCl}_3$ ):  $\delta$  7.7-7.3 (m, 5H, Ph), 6.4 (dt, 1H,  $J_{\text{H,H}} = 14.0, 7.4$  Hz,  $^n\text{BuCH}=\text{}$ ), 5.6 (d, 1H,  $J_{\text{H,H}} = 14.0$  Hz), 2.2-0.8 (m, 9H,  $^n\text{Bu}$ ), 0.38 (s, 6H,  $\text{SiMe}_2$ ).

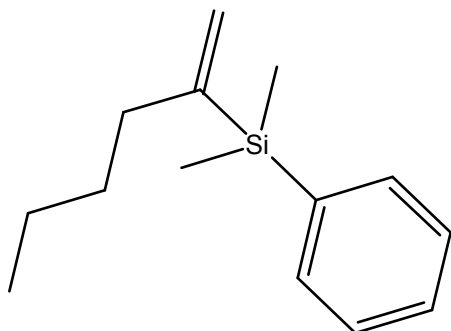

**2-(dimethyl(phenyl)silyl)-1-hexene**<sup>11</sup>

<sup>1</sup>H NMR (300.1 MHz, CDCl<sub>3</sub>): δ 7.7-7.3 (m, 5H), 5.76 (d, 1H,  $J_{H,H} = 2.9$  Hz), 5.38 (d, 1H,  $J_{H,H} = 2.9$  Hz), 2.2-0.8 (m, 9H), 0.41 (s, 6H, SiMe<sub>2</sub>).

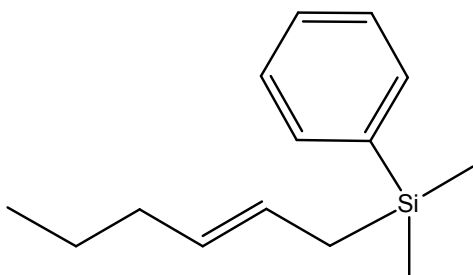

**(E)-1-(Dimethylphenylsilyl)hex-2-ene (12s)**<sup>12</sup>

<sup>1</sup>H NMR (300.1 MHz, CDCl<sub>3</sub>): δ 7.72-7.31 (m, 5H), 5.45-5.24 (m, 2H, =CHCH<sub>2</sub>CH<sub>2</sub>, =CHCH<sub>2</sub>Si), 2.2-0.8 (m, 9H, CH<sub>2</sub>CH<sub>2</sub>CH<sub>3</sub>, CH<sub>2</sub>Si), 0.47 (s, 6H, SiMe<sub>2</sub>).

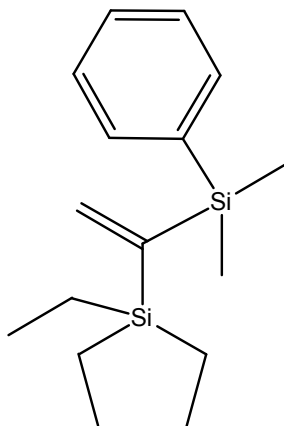

**1-(Dimethylphenylsilyl)-1-(triethylsilyl)ethene**<sup>13</sup>

<sup>1</sup>H NMR (300.1 MHz, CDCl<sub>3</sub>): δ 7.35-7.19 (m, 5H, Ph), AB system ( $\delta_A = 6.40$ ,  $\delta_B = 6.42$ ,  $J_{A,B} = 5.2$  Hz, 2H, CH), 0.64 (t,  $J_{H,H} = 7.8$  Hz, 6H, CH<sub>2</sub>), 0.32 (q,  $J_{H,H} = 7.8$  Hz, 9H, CH<sub>3</sub>), 0.19 (s, 6H, CH<sub>3</sub>).

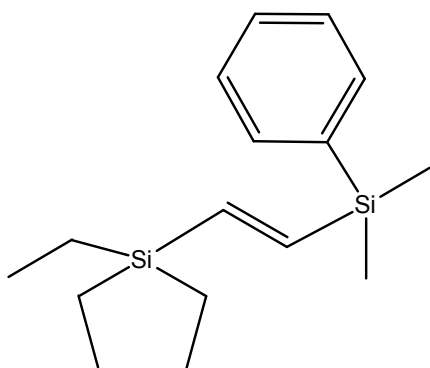

**(E)-2-(Dimethylphenylsilyl)-1-(triethylsilyl)ethene<sup>13</sup>**

<sup>1</sup>H NMR (300.1 MHz, CDCl<sub>3</sub>): δ 7.32-7.15 (m, 5H, Ph), AB system (δ<sub>A</sub> = 6.76, δ<sub>B</sub> = 6.65, J<sub>A,B</sub> = 22.8 Hz, 2H, CH), 0.76 (t, J<sub>H,H</sub> = 8.0 Hz, 6H, CH<sub>2</sub>), 0.41 (q, J<sub>H,H</sub> = 8.0 Hz, 9H, CH<sub>3</sub>), 0.15 (s, 6H, CH<sub>3</sub>).

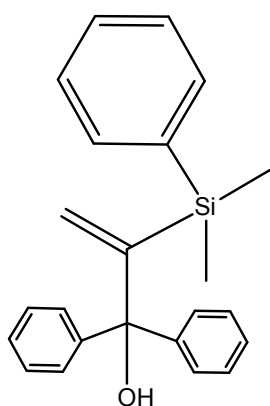

**1-(Dimethylphenylsilyl)-1-(CPh<sub>2</sub>OH)ethene<sup>14</sup>**

<sup>1</sup>H NMR (300.1 MHz, CDCl<sub>3</sub>): δ 7.77-7.24 (m, 15H, Ph), 5.72 (d, J<sub>H,H</sub> = 1.8 Hz, 1H, CH<sub>2</sub>), 5.28 (d, J<sub>H,H</sub> = 1.8 Hz, 1H, CH<sub>2</sub>), 0.39 (s, 6H, CH<sub>3</sub>).

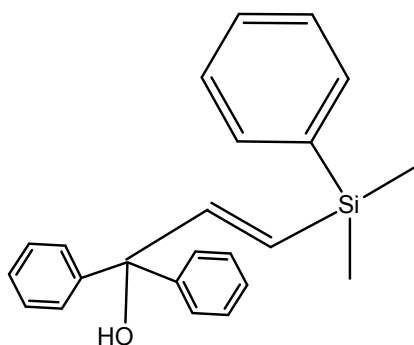

**(E)-2-(Dimethylphenylsilyl)-1-(CPh<sub>2</sub>OH)ethene**

<sup>1</sup>H NMR (300.1 MHz, CDCl<sub>3</sub>): δ 7.77-7.24 (m, 15H, Ph), 6.74 (d, J<sub>H,H</sub> = 18.8, 1H, =CHCPh<sub>2</sub>OH), 6.16 (d, J<sub>H,H</sub> = 18.8 Hz, 1H, =CHSi), 0.35 (s, 6H, CH<sub>3</sub>).

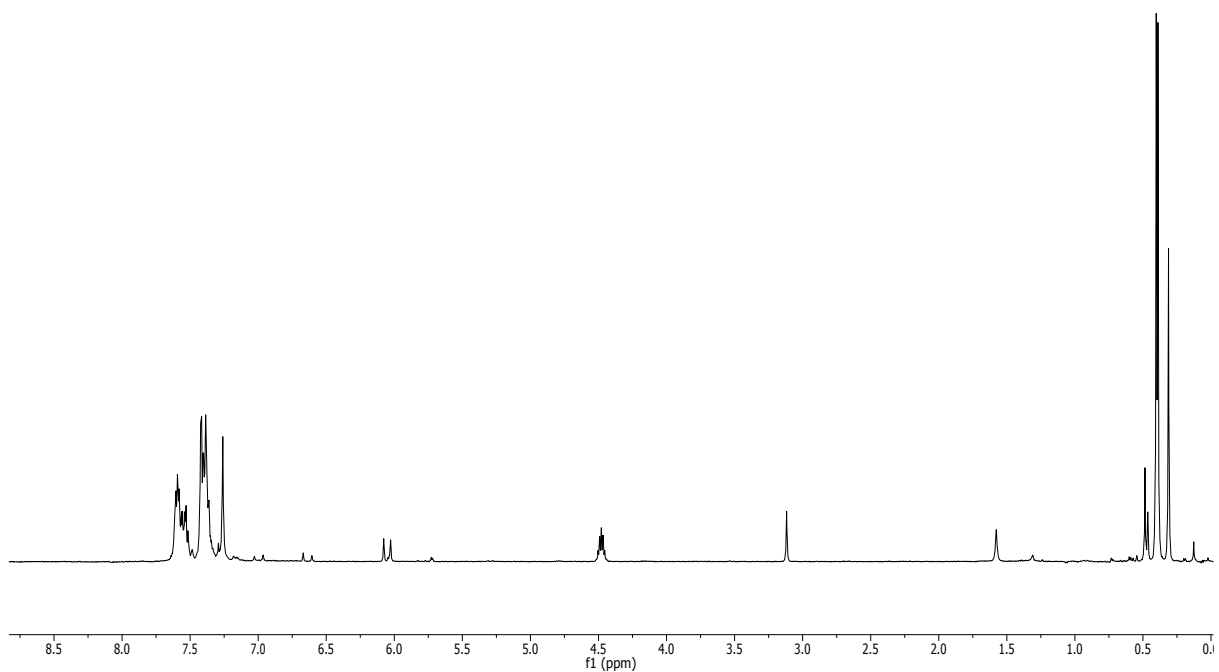

**Fig. 16S** Hydro-silylation of PhC≡CH catalysed by **5**. Reaction conditions (T = 25 °C; Catalyst loading = 1%; t = 2 h).

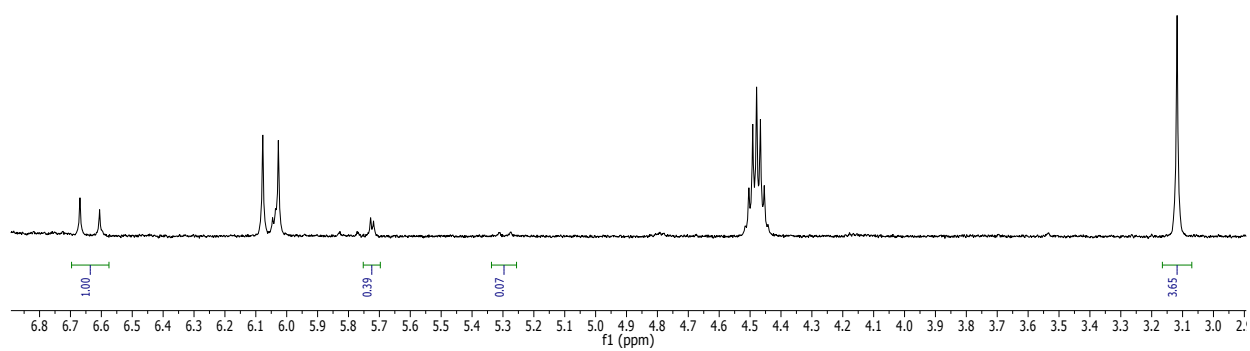

**Fig. 17S** Hydro-silylation of PhC≡CH catalysed by **5** (enlargement). Reaction conditions (T = 25 °C; Catalyst loading = 1%; t = 2 h). Conversion = 54 %, selectivities: **1s**-β(*E*) = 20%; **2s**-β(*Z*) = 70%; **3s**-α = 9%; **4s**-styrene = 1%.

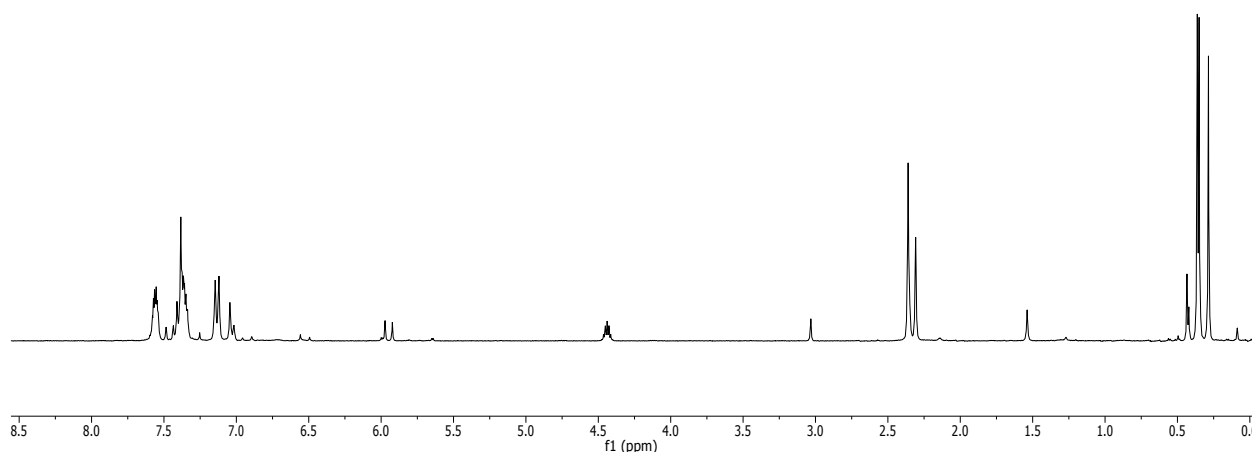

**Fig. 18S** Hydrosilylation of TolC≡CH catalysed by **5**. Reaction conditions (T = 25 °C; Catalyst loading = 1%; t = 2 h).

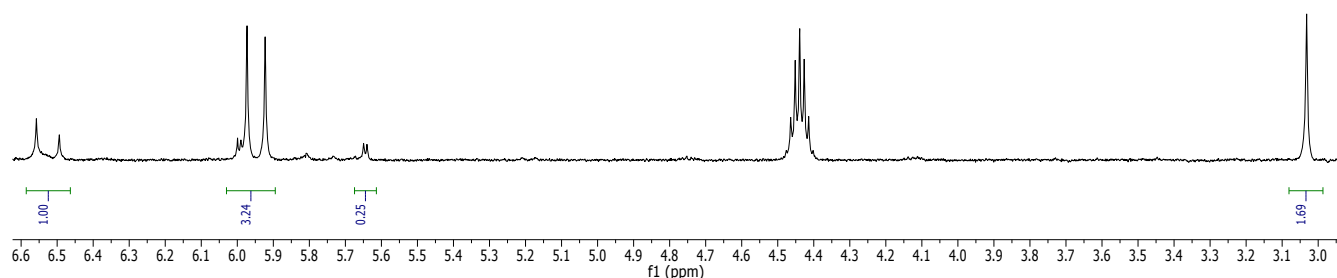

**Fig. 19S** Hydrosilylation of TolC≡CH catalysed by **5** (enlargement). Reaction conditions (T = 25 °C; Catalyst loading = 1%; t = 2 h). Conversion = 71 %, selectivities: **5s**-β(*E*) = 25%; **6s**-β(*Z*) = 69%; **7s**-α = 5%; **8s**-styrene = 1%.

For conversion and selectivity calculation methods used for the hydrosilylation of <sup>n</sup>BuC≡CH, Et<sub>3</sub>SiC≡CH, and (CPh<sub>2</sub>OH)C≡CH see the NMR spectra reported in the supplementary information of ref. 15.

## References

- 1 S. Patil, A. Deally, B. Gleeson, M. Helge, F. Paradisi and M. Tacke, *Appl. Organometal. Chem.*, 2010, **24**, 781.
- 2 S. Patil, J. Claffey, A. Deally, M. Hogan, B. Gleeson, L. M. Menéndez Méndez, H. Müller-Bunz, F. Paradisi and M. Tacke, *Eur. J. Inorg. Chem.*, 2010, 1020.
- 3 S. Sauerbrey, P. K. Majhi, J. Daniels, G. Schnakenburg, G. M. Brändle, K. Scherer and R. Streubel, *Inorg. Chem.*, 2011, **50**, 793.

- 
- 4 R. Corberán, M. Sanaú and E. Peris, *Organometallics*, 2006, **25**, 4002.
- 5 C. Hirtenlehner, C. Krims, J. Hölbling, M. List, M. Zabel, M. Fleck, R. J. F. Berger, W. Schoefberger and U. Monkowius, *Dalton Trans.*, 2011, **40**, 9899.
- 6 C. P. Newman, G. J. Clarkson and J. P. Rourke, *J. Organomet. Chem.*, 2007, **692**, 4962.
- 7 S. Ray, R. Mohan, J. K. Singh, M. K. Samantaray, M. M. Shaikh, D. Panda and P. Ghosh, *J. Am. Chem. Soc.*, 2007, **129**, 15042.
- 8 S. Nakamura, M. Uchiyama and T. Ohwada, *J. Am. Chem. Soc.*, 2004, **126**, 11146.
- 9 Y. Nishihara, D. Saito, K. Tanemura, S. Noyori and K. Takagi, *Org. Lett.*, 2009, **11**, 3546.
- 10 H. Katayama, K. Taniguchi, M. Kobayashi and T. Sagawa, *J. Organomet. Chem.*, 2002, **645**, 192.
- 11 C. H. Jun and R. H. Crabtree, *J. Organomet. Chem.*, 1993, **447**, 177.
- 12 S.; Schwieger, Herzog, R.; Wagner, C.; Steinborn D. *J. Organomet. Chem.* 2009, **694**, 3548.
- 13 M. V. Jimenez, J. J. Perez-Torrente, M. I. Bartolome, V. Gierz, F. J. Lahoz, L. A. Oro, *Organometallics*, 2008, **27**, 224.
- 14 R. Takeuchi, S. Nitta and D. Watanabe, *J. Org. Chem.*, 1996, **60**, 3045.
- 15 L. Busetto, M. C. Cassani, C. Femoni, M. Mancinelli, A. Mazzanti, R. Mazzoni and G. Solinas, *Organometallics*, 2011, **30**, 5258.
